1 **The effects of excess salt intake on the kidney metabolism in Sprague-Dawley rats**

2

3 Satoshi Shimada<sup>1</sup>, Brian R. Hoffmann<sup>2</sup>, Chun Yang<sup>1</sup>, Theresa Kurth<sup>1</sup>, Andrew S. Greene<sup>2</sup>,  
4 Mingyu Liang<sup>1</sup>, Ranjan K. Dash<sup>1,3</sup>, Allen W. Cowley Jr<sup>1</sup> \*.

5

6 1. Department of Physiology, Medical College of Wisconsin, Milwaukee, Wisconsin, USA.

7 2. Mass Spectrometry and Protein Chemistry, Protein Sciences, The Jackson Laboratory, Bar  
8 Harbor, Maine, USA

9 3. Department of Biomedical Engineering, Medical College of Wisconsin and Marquette  
10 University, Milwaukee, Wisconsin, USA.

11

12

13

14

15

16

17

18

19

20

21

22

23

24

25

26 \*Corresponding author

27 Allen W. Cowley, Jr., Ph.D.

28 Department of Physiology, Medical College of Wisconsin

29 8701 Watertown Plank Rd, Milwaukee, WI 53226, USA

30 Tel: +1-414-955-8277

31 Fax: +1-414-955-6546

32 cowley@mcw.edu

1 **Abstract (Limits 250 words (now 239))**

2 In the present study, novel methods were developed which allowed continuous (24/7)  
3 measurement of blood pressure (BP) and renal blood flow (RBF) in freely moving rats and the  
4 intermittent collection of arterial and renal venous blood to estimate kidney metabolic fluxes of  
5 O<sub>2</sub> and metabolites. The study determined the effects of a high salt (HS) diet upon whole kidney  
6 O<sub>2</sub> consumption and the metabolomic profiles of normal Sprague Dawley (SD) rats. A separate  
7 group of rats was studied to determine changes in the cortex (Cx) and outer medulla (OM) tissue  
8 metabolomic and mRNAseq profiles before and following the switch from a 0.4% to a 4.0% NaCl  
9 diet. Significant changes in the metabolomic and transcriptomic profiles occurred with feeding  
10 of the HS diet. A progressive increase of kidney O<sub>2</sub> consumption was found despite a reduction  
11 in expression of most of the mRNA encoding enzymes of TCA cycle. Increased glycolysis was  
12 evident with the elevation of mRNA expression encoding key glycolytic enzymes and release of  
13 pyruvate and lactate from the kidney in the renal venous blood. Glycolytic production of NADH  
14 is used in either the production of lactate or oxidized via the malate aspartate shuttle. Aerobic  
15 glycolysis (e.g., Warburg-effect) may account for the needed increase in cellular energy. The  
16 study provides interesting and provocative new data of how normal kidneys respond to a HS diet  
17 and guides us toward deeper mechanistic studies examining the effects of a HS diet upon kidney  
18 metabolism.  
19

## 1 **Introduction**

2 The process of converting daily food intake into energy and biomass is a complex process with  
3 some operating relatively inefficiently as essential responses for short term survival while others  
4 operating in more efficient and sustained ways required in face of sustained chronic stressors<sup>1-</sup>  
5 <sup>3</sup>. Malnourishment is one such chronic stressor, but industrialized societies are largely faced with  
6 dietary excesses and trying to deal with the consequences of an overload of nutrients and related  
7 condiments. Among the most onerous of these condiments is salt (NaCl) which is no longer  
8 needed for food preservation but is consumed in amounts greatly in excess of what is needed  
9 for survival of the organism. These excesses of dietary salt increase the risk of hypertension  
10 especially in salt-sensitive individuals. Nearly half of hypertensive patients are blood pressure  
11 (BP) salt-sensitive<sup>4-6</sup> and exhibit a 3-fold greater risk of chronic kidney disease (CKD)<sup>7-9</sup>. Yet,  
12 many of the underlying mechanisms remain poorly understood.

13 Many advances have been made in the understanding of the neural and endocrine  
14 controllers of body metabolism<sup>10, 11</sup>. Studies of whole kidney and segmental nephron renal  
15 oxygen and substance metabolism under normal conditions in vitro and in vivo have been widely  
16 conducted and are summarized in textbooks<sup>12, 13</sup>. The effects of what we eat (dietary content)  
17 upon these metabolic responses and energy production within vital organs have recently  
18 received increased attention driven by the obesity epidemic and associated diabetes in  
19 industrialized nations. However, because of the technical difficulties of obtaining repeated  
20 samples from the same individuals, only a few studies have examined the effects of dietary salt  
21 on kidney metabolism which is the subject of the current study. Kidneys have one of the highest  
22 specific metabolic rates among all organs estimated in humans to be over 400 kcal/kg tissue/day,  
23 which is the same as the heart, twice as high as the liver and the brain, and much higher than  
24 other organs<sup>13, 14</sup>. Kidney metabolism is tightly linked to renal tubular transport activities which  
25 are critical for the regulations of fluid and electrolyte homeostasis and blood pressure.

26 Traditionally, studies of organ metabolism have been limited to examination of a relatively  
27 few metabolites<sup>15, 16</sup>. With the emergence of large-scale mass spectrometry and analysis tools  
28 (aka metabolomics), it has become possible to identify and prioritize several thousands of  
29 detected features providing a comprehensive analysis in a tissue specimen of the changes in  
30 metabolism that occur across various organs of the body. The potential power of these methods  
31 was demonstrated recently in a study by Jang et al.<sup>17</sup> who analyzed the arterial and venous  
32 blood of 11 organs in fasted pigs and mapped more than 700 cases of organ-specific metabolite

1 production or consumption. More relevant to the current study, Rinschen et al.<sup>18</sup> recently carried  
2 out a comprehensive metabolomic and proteomic analysis of the kidney glomeruli and cortical  
3 tissue to determine the effects of a high salt diet in a naturally occurring rat model of salt-sensitive  
4 hypertension, the Dahl salt sensitive (SS) rat. As yet, no one has characterized how the kidneys  
5 of a normal subject or rodent may be metabolically altered by a high salt diet.

6 Compared to genomics or transcriptomics, the field of metabolomics is yet in an infant  
7 stage. The metabolome by definition represents the complete set of metabolites found in a  
8 biological sample and build upon the genetic blueprint of an organism. As the end product of  
9 gene expression it represents a sensitive method to measure biological phenotypes and in  
10 contrast to measurements of gene expression can change rapidly in the timescale of seconds  
11 or minutes thereby reflecting the function of the tissue at a given time point. Metabolomics  
12 detects the products of various stages of metabolism which have a wide range of function and  
13 include amino acids, alcohols, vitamins, polyols, organic acids, and many other types of small  
14 molecules generally smaller than 1500 MW in size. Integrating transcriptomics-metabolomics  
15 dataset reveals the bidirectional and multi-faceted interactions between DNA and RNA elements  
16 that lead to observable phenotypes and provides insights into what is going on in a biological  
17 system.

18 Mass spectrometry can measure molecules with wide ranging physical properties which  
19 may vary in polarity and from highly water-soluble organic acids to very nonpolar lipids<sup>19, 20</sup>.  
20 Metabolomic technology platforms must therefore divide the metabolome into subsets of  
21 compounds based on polarity, common functional groups, or structural similarity. Varying  
22 methods of sample preparation are required to optimize the analysis of each class of  
23 compounds. Frequent refinements of these methods are common in this rapidly evolving field,  
24 the precision of instruments used for analysis differs and the degree of certainty in metabolite  
25 identification varies between laboratories.

26 In the present study, we have developed a novel system which allows us to measure  
27 blood pressure (BP) and renal blood flow (RBF) continuously (24/7) in freely moving rats, and  
28 collect arterial and renal venous blood repeatedly. We have determined the effects of a high salt  
29 diet upon the transcriptomic and metabolomic profiles of the kidney cortex and outer medulla of  
30 normal Sprague Dawley (SD) rats. The global metabolism in the kidney was examined by  
31 differences between the arterial input and the two major exit routes, the renal venous blood and  
32 urinary output. Rats were studied at weekly intervals following an increase of dietary salt intake



1 from 0.4% (LS) to 4.0% (HS) NaCl. Novel analytical approaches for tissue, plasma and urinary  
2 metabolism were developed to determine metabolic profiles by 4 modes (C18+/- and HILIC+/-)  
3 using a Thermo Q-Exactive Orbitrap coupled to a dual-channel Vanquish Ultra-Performance  
4 Liquid Chromatography (UPLC) system. Tissue, plasma, and urinary samples were analyzed  
5 with separation over a hydrophobic (C18) and hydrophilic (HILIC) column under both positive  
6 and negative polarity to maximize identification of metabolites<sup>21</sup>. Differential metabolites include  
7 numerous lipids, amino acids, and bioenergetic compounds, among others. The results of the  
8 study show that even normal SD rats undergo enormous shifts in transcriptomic and  
9 metabolomic profiles in response to eating a HS diet. These adaptations appear necessary to  
10 sustain vital physiological functions of the kidney and to prevent injury in face a great increase  
11 of the metabolic workload placed upon the kidney when subjected to sustained high salt diets.

12

13

## 1 **Methods**

### 2 Animals

3 Male SD rats were purchased from Envigo (Indianapolis, IN) and housed in environmentally  
4 controlled rooms with a 12-h light/dark cycle. Rats had free access to 0.4% NaCl AIN-76A diet  
5 (LS) (Dyets, Bethlehem, PA) and water ad libitum. All protocols were approved by the Medical  
6 College of Wisconsin Institutional Animal Care and Use Committee.

7

### 8 Chronic RBF measurement and blood sample collection

9 Rats (n=7, 10-11 weeks of age) were performed renal blood flow (RBF) probe (Transonic, Ithaca,  
10 NY) implantation and femoral arterial catheterization as previously described<sup>22, 23</sup>. Briefly, rats  
11 were anesthetized with isoflurane and arterial catheter was inserted as previously described<sup>24-</sup>  
12 <sup>26</sup>. Following an abdominal incision, RBF probe was implanted on left renal artery and the cable  
13 was exposed at nape of the neck via the subcutaneous route. In addition to the RBF probe  
14 implantation, renal venous catheter (MRE025, BRAINTREE, MA) was inserted through the  
15 femoral vein and placed in the left renal vein and secured to the luminal wall with 10-0 nylon  
16 (**Figure S1**). Three percent heparinized saline was infused at a rate of 100  $\mu$ L/h through arterial  
17 and renal venous catheter throughout the study. RBF and blood pressure (BP) via arterial line  
18 were measured by conscious freely moving rats and recorded on average of every minute for  
19 24 h/day. After 7-10 days of recovery period, arterial and renal venous blood were sampled  
20 before and following 7, 14 and 21 days after the switch in diet from 0.4% (LS) to 4.0% (HS) salt  
21 diet (Dyets Inc, Bethlehem, PA). Blood gases (pO<sub>2</sub> and pCO<sub>2</sub>; mmHg), electrolytes, total  
22 hemoglobin concentration (Hb; g/dL), and oxyhemoglobin saturation (SHbO<sub>2</sub>; %) were  
23 immediately measured by radiometer (ABL800 FLEX, Brea, CA). Overnight urine (18 hours)  
24 from the day before the blood draw were collected on ice. The kidneys were collected either at  
25 14 days of HS (HS14) or 21 days of HS (HS21). The kidneys of only LS fed SD rats were also  
26 collected for comparison. The collected kidneys (n=5 for each group for metabolomics and  
27 mRNAseq analysis) were dissected to cortex and outer medulla and snap frozen with liquid  
28 nitrogen. Plasma, urine and tissue were stored in -80°C until further analysis.

29 RBF is often normalized by kidney weight, but it is impossible to repeatedly measure the  
30 kidney weight of the same rats and even measuring body weight repeatedly is difficult in this  
31 model. As salt did not alter the kidney weight of surgical sham control rats (n=5 for LS group,  
32 n=6 for HS group) (**Table S1**), data normalization to body weight was performed.

1 Since glomerular filtration rate (GFR) experiments and blood draws were performed  
2 during the daytime, the average RBF over a 12-hour period during the daytime (6AM-6PM) was  
3 used for the following calculations.

4

#### 5 Chronic GFR measurement

6 GFR was measured by separate group of rats (n=6) by transcutaneous measurement of FITC-  
7 sinistrin as previously described<sup>22, 27, 28</sup>. Briefly, inferior vena caval catheter was placed 7-10  
8 days before GFR measurement via femoral vein. An abdominal median incision was performed  
9 to be considered as a surgical sham of the other group. GFR was measured before and following  
10 7, 14 and 21 days after the switch in diet from LS to HS. GFR (mL/min/100 g body wt) was  
11 defined as 21.33 mL/100 g body wt, the conversion factor calculated by Friedemann et al.<sup>29</sup>,  
12 divided by FITC-sinistrin half-life (min). From the GFR and RBF from the other group, filtration  
13 fraction was calculated by the formula below:

14 
$$\text{Filtration fraction} = \text{GFR} / (2 \times \text{RBF} \times (1 - \text{Hct}))$$
, where Hct is the hematocrit.

15

16 Tubular reabsorption of sodium was estimated as below<sup>30</sup>:

17 
$$\text{GFR} \times \text{whole blood Na}^+ \text{ (measured in RBF group rats by radiometer)} - \text{Urine flow} \times \text{urinary}$$
  
18 
$$\text{Na}^+ \text{ (measured in RBF group rats by radiometer)}.$$

19

#### 20 Metabolomics analysis

21 *Plasma/Urine Metabolite Extraction.* Metabolites were extracted from 20  $\mu\text{L}$  of plasma and 20  
22  $\mu\text{L}$  of urine from each SD rat in the study according to standard operating procedures in the  
23 Mass Spectrometry and Protein Chemistry Service at The Jackson Laboratory<sup>21</sup>. Metabolites  
24 were extracted using 500  $\mu\text{L}$  of an ice cold 2:2:1 methanol:acetonitrile:water (MeOH:ACN:H<sub>2</sub>O)  
25 buffer; the sample was part of the water fraction. Caffeine, 1-naphthylamine, and 9-anthracene  
26 carboxylic acid were all added at 0.5 ng/  $\mu\text{L}$  in the extraction buffer as internal standards. Each  
27 sample was then vortexed for 30 seconds on the highest setting, subject to one minute of  
28 mixing with the Tissue Lyser II in pre-chilled cassettes, and then sonicated at 30 Hz for 5  
29 minutes of 30 seconds on 30 seconds off in an ice waterbath. Samples were then placed in  
30 the -20°C freezer overnight (16 hours) for extraction. Following the extraction, samples were  
31 centrifuged at 21,000 x g at 4°C and supernatant from each metabolite extract was equally  
32 divided into five 2 mL microcentrifuge tubes. Each sample supernatant was divided into five

1 equal volume aliquots, one for each of the four modes and the rest to create equal  
2 representation pools of all samples, one for each mode. Each aliquot was then dried down  
3 using a vacuum centrifuge for storage at -80°C until further use.

4

5 *Tissue Metabolite Extraction.* Metabolites were extracted from 20 mg of kidney cortex and  
6 medulla from each SD rat in the study according to standard operating procedures in the Mass  
7 Spectrometry and Protein Chemistry Service at The Jackson Laboratory<sup>21</sup> as described for the  
8 plasma and urine samples with slight modification. Metabolites were extracted using 1000 µL of  
9 an ice cold 2:2:1 methanol:acetonitrile:water (MeOH:ACN:H<sub>2</sub>O) buffer containing internal  
10 standards as above per 20 mg of sample to ensure the extraction equivalents were normalized.  
11 Each sample had a 5 mm stainless steel bead added, then were pulverized in extraction buffer  
12 for two minutes using Tissue Lyser II. Samples were then placed in the -20°C freezer overnight  
13 (16 hours) for extraction and the supernatant was collected as with the urine/plasma samples.  
14 Each sample supernatant was divided into five equal volume aliquots, one for each of the four  
15 modes and the rest to create equal representation pools of all samples, one for each mode.  
16 Each aliquot was then dried down using a vacuum centrifuge for storage at -80°C until further  
17 use.

18

19 *Discovery Metabolomics Analysis.* The Mass Spectrometry and Protein Chemistry Service at  
20 The Jackson Laboratory performed four mode metabolomics analysis using a Thermo Q-  
21 Exactive Orbitrap mass spectrometer coupled to a dual-channel Vanquish Ultra-Performance  
22 Liquid Chromatography system as described previously<sup>21</sup>. All samples were subject to the four  
23 modes of analysis consisting of a 25-minute gradient over a hydrophobic C18 column (Agilent  
24 InfinityLab Poroshell 120 EC-C18, #699775-902T) and a hydrophilic HILIC column (Agilent  
25 InfinityLab Poroshell 120 HILIC-Z, #689775-924) column in positive and negative polarity. The  
26 C18 runs used a gradient from 99.8% H<sub>2</sub>O with 0.2% acetic acid (Solvent A1) to 99.8% ACN  
27 with 0.2% acetic acid (Solvent B1). The specific C18 gradient consisted of the following steps:  
28 0-1 minutes at 98% A1/2% B1, 1-13 minutes from 98% A1/2% B1 to 10% A1/90% B1, 13-15  
29 minutes at 10% A1/90% B1, 15-16 minutes from 10% A1/90% B1 to 98% A1/2% B1, and was  
30 re-equilibrated from 16-25 minutes at 98% A1/2% B1. All HILIC positive runs used a gradient  
31 from 10 mM ammonium formate in H<sub>2</sub>O with 0.1% formic acid (Solvent A2) to 90% ACN with 10  
32 mM ammonium formate in H<sub>2</sub>O with 0.1% formic acid (Solvent B2). HILIC negative runs utilized

1 a gradient of 10 mM ammonium acetate in H<sub>2</sub>O, pH 9.0 with 0.1% AffinityLab Deactivator  
2 Inhibitor (Agilent, #5191-3940; Solvent A3) to 85% ACN with 10 mM ammonium acetate in H<sub>2</sub>O  
3 with 0.1% AffinityLab Deactivator Inhibitor (Solvent B3). The 25 minute gradient for the HILIC  
4 modes consisted of the following steps (A/B refer to A2/A3 B2/B3 for the respective HILIC mode):  
5 0-1 minutes at 2% A/98% B, 1-11 minutes from 2% A/98% B to 30% A/70% B, 11-12 minutes  
6 from 30% A/70% B to 40% A/60% B, 12-16 minutes from 40% A/60% B to 95% A/5% B, was  
7 held at 95% A/5% B from 16-18 minutes, 18-20 minutes from 95% A/5% B to 2% A/98% B, and  
8 was re-equilibrated from 20-25 minutes at 2% A/98% B.

9 Each sample was reconstituted in 25  $\mu$ L of 95% H<sub>2</sub>O/5% ACN for C18 modes and 95%  
10 ACN/5% H<sub>2</sub>O for HILIC modes. The sample run sequence was randomized (Random.org) and  
11 two technical replicates for each sample were injected at 10  $\mu$ L (represents  $\sim$ 2  $\mu$ L of fluid  
12 samples or 2 mg of tissue sample starting volume weight, respectively, per run). Quality control  
13 pooled samples representing all samples within the specific fluid/tissue were run at the beginning  
14 and end of the run set at concentrations equivalent to the samples. These pooled samples were  
15 used for normalization through a quality control batch correction of the runs over time to account  
16 for technical variance. All instrument settings were set as described in a previous study<sup>21</sup>.

17  
18 *Metabolomics Data Analysis.* The RAW data files were analyzed using Thermo Compound  
19 Discoverer (v3.2.0.421) according to supplementary methods from a previous study at The  
20 Jackson Laboratory<sup>21</sup>. Spectra in the data were subject to a blank background subtraction to  
21 remove contaminant peaks (S/N threshold = 2). Additionally, all data was subject to a quality  
22 control correction selecting for peaks only consistently detected in the pool for normalization.  
23 The MS1 and MS2 data was searched against the Thermo mzCloud database, ChemSpider  
24 database, Metabolika Pathways, and mzLogic predicted composition in the Compound  
25 Discoverer workflow. All data was then filtered for consistency of detection using a coefficient of  
26 variation  $\leq$  35% in any group, as well as for quality of MS2 spectral matching using an MS2 FISH  
27 coverage filter  $>$  10 in Compound Discoverer. Differential comparisons were performed  
28 comparing normalized abundances and p-values were calculated using the Tukey HSD test  
29 (posthoc) after an ANOVA test. From there the p-values were adjusted for stringency in the  
30 multiple testing using the Benajmini-Hockberg algorithm. Further analysis was performed using  
31 a combination of Compound Discoverer, custom R analysis, and MetaboAnalyst as needed.

32

1 Lactate assay

2 Tissue and plasma lactate concentration was validated by a commercially available kit according  
3 to the manufacturer's instructions (PicoProbe™ Lactate Fluorometric Assay Kit, Bio Vision Cat#  
4 K638-100).

5  
6 RNAseq analysis

7 RNAseq analysis and data analysis were performed at Novogene (Durham, NC). Methods are  
8 described in a separate document.

9  
10 Determination of kidney O<sub>2</sub> and metabolites extraction ratio

11 Whole blood O<sub>2</sub> extraction was calculated as previously described<sup>31</sup>:

12  $Oxygen\ content\ (mL/dL) = (1.31 \times Hb\ (g/dL) \times SHbO_2) + (0.003 \times pO_2)$

13  $Oxygen\ delivery\ (DO_2)\ (mL/min) = RBF\ (daytime\ 12\ hr;\ mL/min) \times arterial\ oxygen\ content$   
14  $(mL/mL)$

15  $Oxygen\ consumption\ (VO_2)\ (mL/min) = RBF\ (daytime\ 12\ hr) \times arterial\ -renal\ venous\ content$   
16  $difference$

17  $Oxygen\ extraction\ ratio = VO_2/DO_2$

18  
19 Plasma metabolites flux was calculated similarly.

20  $Metabolites\ flux = (RBF \times (1-Hct) \times arterial\ -renal\ venous\ metabolites\ difference - Urine\ flow \times$   
21  $urinary\ metabolites) / (RBF \times (1-Hct) \times arterial\ metabolites)$

22  
23 Data analysis of metabolomics

24 Compound names were converted to the corresponding names available in the Metaboanalyst  
25 5.0 database (<https://www.metaboanalyst.ca>) (analyzed September-December 2022) by  
26 "Compound ID Conversion" and those compounds are used as "reference metabolome" which  
27 can be detected based on our analytical platform. Sparse partial least squares discriminant  
28 analysis (sPLS-DA) for all named compounds in each of the 4 modes (C18+/- and HILIC+/-) was  
29 performed. The number of components was fixed at 5 and variables per component at 20. Heat  
30 map with the hierarchical clustering analysis was performed for significantly changed  
31 compounds between LS, HS7, HS14 and HS21 (ANOVA Fisher's LSD p<0.05) with a Euclidean  
32 distance measure and by the Ward algorithm. Enrichment analysis for tissue metabolites was

1 performed for significant differences by t-test ( $p < 0.05$ ) in each of HS14 and HS21 compared to  
2 LS. Enrichment analysis for plasma metabolites was performed for significant different  
3 metabolites by linear models with covariate adjustments ( $p < 0.05$ ) in arterial and venous  
4 differences. Those data analyses of metabolomics were performed using Metaboanalyst<sup>32</sup>.

5

### 6 *Statistical analysis*

7 Continuous values are presented as the means  $\pm$  standard error of the means (SEM). Statistical  
8 comparisons were made using a t-test for two-group comparisons, and analysis of variance  
9 (ANOVA) followed by Holm Sidak's post-hoc test for multiple between-group comparisons. A  
10  $p < 0.05$  was considered significant. ROUT test was performed for outlier test ( $Q = 5\%$ ). The error  
11 in the values obtained by combining values in tubular reabsorption of  $\text{Na}^+$  calculation with errors  
12 was indirectly estimated based on the error propagation formula shown below ( $M$ : Mean,  $e$ :  
13 error)<sup>33</sup>:

$$14 \quad (M_1 \pm e_1) \pm (M_2 \pm e_2) = (M_1 \pm M_2) \pm (e_1^2 + e_2^2)^{1/2}$$

$$15 \quad (M_1 \pm e_1) \times (M_2 \pm e_2) = (M_1 \times M_2) \pm ((M_2 \times e_1)^2 + (M_1 \times e_2)^2)^{1/2}$$

$$16 \quad (M_1 \pm e_1) / (M_2 \pm e_2) = M_1 / M_2 \pm ((e_1/M_2)^2 + (M_1/M_2^2 \times e_2)^2)^{1/2}$$

17

18



## 1 **Results**

### 2 Effects of high salt diet on arterial pressure, renal blood flow, and O<sub>2</sub> extraction.

3 Average 24 hr mean arterial pressure (MAP) of SD rats slightly but significantly increased from  
4  $114 \pm 2$  to  $119 \pm 2$  mmHg ( $p < 0.05$ ) in 3 days after switching the diet from LS to HS and  
5 maintained at that level throughout the study (**Figure 1A**). Average 24 hr RBF rose nearly 20%  
6 during the first 3 days from  $10.0 \pm 0.6$  to  $11.6 \pm 0.6$  mL/min ( $p < 0.05$ ; **Figure 1B**) and was  
7 sustained at this elevated level throughout the 21 days of the HS diet. Normalized by the body  
8 weight changes determined in the surgical sham control rats (**Table S2**), the increase in RBF  
9 with the HS diet remained statistically significant at HS7, HS14 and HS21 (**Table S3**). Renal  
10 vascular resistance (RVR) did not change by HS ( $p = 0.75$ ). An example of a SD rat in which  
11 arterial pressure and RBF were recorded continuously (24/7) before and 21 days following the  
12 switch to the HS diet is illustrated in **Figure S2A and B**. A similar rise of RBF was observed in  
13 every rat studied and a similar increase in the magnitude of the diurnal rhythm of the RBF was  
14 observed in all rats. Shown in **Figure S3**, total urinary Na<sup>+</sup> excretion increased 10-fold (from  $0.9$   
15  $\pm 0.1$  to  $10.3 \pm 0.4$   $\mu\text{mol}/\text{min}$ ) consistent with the 10-fold increase in the percent of NaCl in the  
16 diet when switch from 0.4% salt to 4.0% NaCl.

17 With the increase of RBF, the O<sub>2</sub> delivery increased proportionally to RBF due to the  
18 unchanged O<sub>2</sub> content in artery (**Table S4**) and remained elevated throughout the 21 days of  
19 the HS diet (**Figure 1C**). Both the calculated O<sub>2</sub> consumption (**Figure 1D**) and extraction ratio  
20 (**Figure 1E**) rose progressively throughout the 21 days of the HS diet with the ratio increasing  
21 from  $0.10 \pm 0.01$  to  $0.14 \pm 0.01$  ( $p < 0.05$ ) by HS21. This trend was maintained when normalized  
22 by body weight (O<sub>2</sub> delivery:  $p = 0.186$ ; O<sub>2</sub> consumption and O<sub>2</sub> extraction;  $p < 0.05$ ) (**Table S3**).

### 23 24 Effects of high salt diet on GFR and calculated filtration fraction.

25 In a separate group of rats, the total body GFR was determined in unanesthetized rats which  
26 underwent the same surgery (sham) as those with implanted renal flow probes and subjected to  
27 the same dietary protocol. As summarized in **Table S2** and **Figure 1F**, GFR increased from  
28  $0.64 \pm 0.04$  at LS to  $0.83 \pm 0.05$  at HS7 (mL/min/100 g body weight) ( $p < 0.05$ ) and was thereafter  
29 maintained at that level throughout the study. The filtration fraction (**Figure 1G**), calculated using  
30 the RBF determined from the continuously recorded rat group, was increased from  $0.18 \pm 0.01$   
31 at LS to  $0.22 \pm 0.02$  at HS7 and remained elevated at this level throughout the study. As



1 determined from these data, a strong positive correlation was found between total tubular  
2 reabsorption of Na<sup>+</sup> and O<sub>2</sub> consumption as presented in **Figure 1H**.

3  
4 Effects of high salt diet on untargeted metabolomic profiles of cortical and outer medullary tissue.

5 **Figure S4A** summarizes the total number of compounds detected in the renal cortical tissue  
6 (Cx) (5959) and in the outer medullary tissue (OM) (5785) combining the results detected in all  
7 modes. As illustrated, of the 5959 compounds in the Cx and 5785 in the OM, 2851 and 2620 are  
8 named compounds by Thermo Compound Discoverer (**Figure S4B**). Of all named compounds,  
9 968 in Cx and 861 in OM were found in the Metaboanalyst 5.0 database (**Figure S4B**).  
10 Comparing LS values to those obtained after 14 days of the HS diet (HS14), it was found that  
11 284 metabolites were significantly changed (raw  $p < 0.05$ ) in the Cx and an equal number (284)  
12 significantly changed in the OM. Comparing LS values to those obtained after 21 days of the HS  
13 diet (HS21), 438 were significantly changed in the Cx and 349 in the OM (raw  $p < 0.05$ ) (**Figure**  
14 **S4B**). P-value adjustments (Benjamini-Hockberg) reduced the chance of making Type-I errors  
15 and it was found that 138 named metabolites were significantly changed at HS14 compared to  
16 LS (adjusted  $p < 0.05$ ) in the Cx and 229 in the OM. At HS21, 218 were significantly changed in  
17 the Cx and 225 in the OM.

18 A sparse partial least squares discriminant analysis (sPLS-DA) was carried out for these  
19 named compounds to visualize and assess similarities and differences of metabolites in  
20 response to the HS diet. For each of the 4 modes (C18 +/- and HILIC +/-), 5 components with  
21 20 variables per rat were analyzed. As shown in **Figure 2A**, the analysis revealed that separate  
22 metabolic states were distinguishable within the Cx and OM tissues in response to the HS diet  
23 at both days 14 and 21. A clear distinction is observed between LS and HS14 and HS21 days  
24 of feeding.

25 The significantly altered metabolites (ANOVA Fisher's LSD  $p < 0.05$ ) determined in the  
26 C18+ mode were 321 of 1114 in Cx and 151/668 in OM. The significantly altered metabolites  
27 in the C18- mode were Cx 161/649 and OM 225/804; in the HILIC+ mode were Cx 241/565  
28 and OM 129/805; and in the HILIC- mode were Cx 63/564 and OM 91/470. The heat maps of  
29 those metabolites are shown in **Figure 2B** in which the distinctive patterns observed by sPLS-  
30 DA were validated in the hierarchical clustering which was performed with a Euclidean distance  
31 measure and by the Ward algorithm.

1 A metabolite enrichment analysis was performed for those metabolites that were  
2 significantly changed ( $p < 0.05$ ) to prioritize and place them into known biological pathways as  
3 described by the small molecule pathway database (SMPDB). As shown in **Figure S5**, the  
4 “arachidonic acid metabolism” was significantly enriched in the Cx at HS14. In the OM, the  
5 “tyrosine metabolism”, the “lysine degradation”, and the “beta alanine metabolism” were  
6 significantly enriched at HS14. Notably, at HS21, no enrichment of any of the metabolomic  
7 pathways was found either in the Cx or in the OM.

### 8 Effects of high salt upon cortical and outer medullary mRNA expression (mRNAseq analysis).

9 mRNAseq analysis was performed on the same tissue analyzed for metabolites as described  
10 above to validate identification of enriched metabolomic pathways using a denser genomic scale  
11 dataset (e.g., ~3000 named metabolites vs. ~30,000 gene transcripts). There were 32,545 genes  
12 identified by mRNAseq. Within that, as adjusted using  $p < 0.05$  by Benjamini and Hochberg’s test,  
13 comparing LS to HS14, 497 significantly increased and 422 decreased in Cx. Comparing LS to  
14 HS21, 3044 increased and 2917 decreased in Cx., In the OM, comparing LS to HS14, 91  
15 increased and 22 decreased and comparing LS to HS21, 555 increased and 165 decreased.

16 The pathway analysis of mRNAseq data (KEGG) (**Figure 3**) found that genes most  
17 upregulated in the Cx tissue of SD rats fed HS diet were those related to the “Signaling molecules  
18 and interaction pathway”, the “Immune system pathway” (red bars), and related pathways  
19 including “Cytokines receptors”, “Chemokine signaling”, “NF-kappa B signaling”, “Th17 cell  
20 differentiation”, “T cell signaling”, etc. Those pathways most downregulated were those related  
21 to metabolism (blue bars) including “TCA cycle”, “Fatty acid degradation”, “Valine, Leucine and  
22 Isoleucine degradation”, “Glycine, Serine and Threonine metabolism”, “Carbon metabolism”, etc.  
23 In the OM tissue, the upregulated pathways were also largely related to the immune system, but  
24 interestingly fewer pathways of metabolism were found to be downregulated with the HS diet.

25 After excluding genes with a count of less than 100 in the mRNAseq data, the top 20 and  
26 bottom 20 with the largest fold change (FC) in HS compared to LS are shown in **Table S5**. In  
27 addition to some genes showing immune system upregulation (i.e. *C1s*, *C3*, *RT1-Db1*, *Itgal*, etc),  
28 genes with large FCs in Cx were also found in the *Mthfr* gene whose polymorphisms are related  
29 to hypertension<sup>34</sup>, *Nrep* also known as *P311* stimulates translation of TGF $\beta$  and is related to  
30 tissue fibrosis<sup>35</sup>, and *Slc16a1* also known as *Mct2* is a proton-linked monocarboxylate  
31 transporter<sup>36</sup>. Immune system related genes were also upregulated in OM.

1

2 mRNA expression of cortical transporters.

3 Of special mechanistic interest were the changes in gene expression of tubular transporters  
4 affected by the HS diet. **Figure S6** shows the Cx tissue mRNA expression of genes encoding  
5 transporters for glucose and amino acids that tended to be downregulated at HS14 with most of  
6 these reaching statistical significance by HS21. This includes amino acid transporters (*Slc1*,  
7 *Slc3*, *Slc7*), sodium-glucose transporters (SGLT isoforms *Slc5a1*, *Slc5a2*), urate (*Slc22a12*) and  
8 lactate transporters (*Slc5a12*, *Slc5a8*). It was found that the glucose transporter 2 (GLUT  
9 isoforms *Slc2a2*) were down regulated at HS21 while expression of *Slc2a1* was increased.  
10 Although it is unclear which of these would predominate functionally, it is evident that the  
11 upregulation of the GLUT transporters would be consistent with a greater release of glucose and  
12 glycolysis products being released into the interstitial space. Also of note, monocarboxylate  
13 transporters (MCT) and Na<sup>+</sup>-K<sup>+</sup>-ATPases were upregulated by the HS diet which is consistent  
14 with enhanced proximal tubule Na<sup>+</sup> reabsorption necessitating greater utilization of ATP for  
15 active transport. Sodium transporters and channels including NHE3 (*Slc9a3*), NKCC2 (*Slc12a1*),  
16 NCC (*Slc12a3*) and ENaC (*Scnn1*) were upregulated. On the other hand, the effect of HS on the  
17 OM transporter genes was modest (**Figure S7**).

18 In addition, proteolysis related genes are picked up in **Figure S6** as well. There are  
19 myriads of proteolytic enzymes expressed in the kidney<sup>37, 38</sup>, and those are effected by HS diet  
20 in Cx tissue. Genes encoding protease-activated receptors (*F2r*)<sup>39</sup> are upregulated by HS,  
21 whereas megalin (*Lrp2*) and clathrin (*Cltc*) were reduced. Interestingly, within cathepsin  
22 encoding genes, *Ctsa* and *Ctsb* which mainly expressed at proximal tubule (PT) S1 were  
23 downregulated and *Ctsc* and *Ctsd* which mainly expressed at distal tubule (DT) and connecting  
24 tubule (CNT) were upregulated.

25

26 Omic integration with statistical mapping and validation of metabolomic and mRNAseq data.

27 Data obtained from the metabolomics and mRNAseq analysis can be effectively utilized in  
28 several ways. First, to validate against each other the predicted pathways that appear to be most  
29 affecting metabolic functions when fed a high salt diet. Second, to identify pathways that were  
30 not of obvious importance from the metabolomic analysis given the limited number of  
31 compounds that can currently be identified by a global mass spec analysis.

1 **Figure 4** summarizes the integrated metabolomic and mRNA expression data related to  
2 mitochondrial energy production in the Cx sample. By HS21, both metabolites and genes  
3 encoding the major enzymes of the TCA cycle were found to be generally downregulated  
4 including reductions of citric acid, succinic acid, and fumarate. While mRNAs encoding enzymes  
5 in the TCA cycle were downregulated overall, some of mRNAs encoding proteins that make up  
6 the electron-transfer complex were not (**Figure 4**). Especially, many genes encoding for many  
7 proteins of complex V including *vatpases* were upregulated at HS21 while the expression of  
8 others was reduced. It was also found that the gene encoding uncoupling protein 2 (*Ucp2*) was  
9 upregulated by HS.

10 Several other important pathways were enriched in the metabolomic enrichment analysis  
11 (**Figure S8**). Specifically, the “Arachidonic acid metabolism” pathway in the Cx (**Figure S8A**)  
12 and the “Lysine degradation” pathway in the OM (**Figure S8B**) were altered by the HS diet. As  
13 shown in **Figure S8A**, the metabolomic analysis in the Cx found that arachidonic acid was  
14 significantly increased at HS14, together with downstream metabolites 8-HETE and  
15 thromboxane B2 (TXB2). The general upregulation of this pathway is reinforced by enhanced  
16 expression of most of the genes on arachidonic acid metabolism pathway which were  
17 upregulated on HS14 and HS21 compared to expression observed with the LS diet. The notable  
18 exception to this were the *Cyp-4* genes important in the production of 20-HETE which has both  
19 pro- and anti-hypertensive actions resulting from modulation of vascular and tubular functions of  
20 the kidney<sup>40</sup>. **Figure S8B** illustrates the “Lysine degradation” pathway in which many key  
21 elements were found in the metabolomic analysis to be downregulated in the OM as found at  
22 days HS14 and HS21. This included reduction of tissue lysine itself and reduced levels of  $\alpha$ -  
23 ketoglutarate, glutamate, and allysine. However, since lysine was significantly reduced, a  
24 reduction in the metabolites derived from lysine would be expected to be also reduced since no  
25 significant changes in the enzymes in this pathway were observed by the mRNAseq analysis.

26  
27  
28 Effects of the high salt diet upon glycolysis in the renal cortex.

29 As illustrated in **Figure 5A**, the Cx levels of glucose tended to be reduced by day 14 of the HS  
30 diet and were significantly reduced by day 21 of the HS diet. A seemingly compensatory  
31 response is reflected by the observation that many genes encoding glycolytic enzymes were  
32 upregulated at HS14 and even more so at HS21. Significant increases ( $p < 0.05$ ) were found in

1 hexokinase isoforms (*Hk1*, *Hk2*, *Hk3*) required for conversion of glucose to glucose 6-P, and in  
2 phosphofructokinase isoforms (*Pfkl*, *Pfkp*, *Pfkm*), required to convert glucose 6-P to fructose 1,6-  
3 BP. A reduction of glyceraldehyde 3-P and 3-phosphoglycerate was found at HS21 and several  
4 isoforms of aldo-keto reductase (*Aldoa*, *Aldob*, *Aldoc*) and glyceraldehyde-3-phosphate  
5 dehydrogenase (*Gapdh*) were found to be reduced at HS21. Increases were also found in  
6 pyruvate kinase (*Pkm*, *Pklr*). The Cx pyruvate levels tended to be increased at HS14 but did not  
7 differ from levels observed with LS at HS21. Lactate dehydrogenases (*Ldha*, *Ldhb*, *Ldhc*) were  
8 also upregulated, but the tissue lactate did not differ from levels observed with LS at either HS14  
9 or HS21.

10 The relationship of glycolysis with the oxidative pentose phosphate pathway (PPP) is also  
11 illustrated in **Figure 5A**. A moderate increase ( $p < 0.05$ ) of ribose-5-phosphate was found at HS14  
12 indicating a greater oxidation of glucose via this pathway which at this time would yield greater  
13 NADPH to scavenge ROS. However, at HS21 ribose-5-phosphate was no longer found to be  
14 elevated. As activation of glycolysis was of particular interest, lactate concentration in the Cx  
15 tissue was validated by fluorescent lactate analysis which showed the similar trend as  
16 metabolomics data (**Figure 5B**). Further arteriovenous flux analysis is discussed below.

17 In general, it appears that metabolites of the glycolytic pathway in the Cx may be initially  
18 elevated at HS14 but by HS21 appear to be reduced to levels similar to or less than that observed  
19 when fed the LS diet. As noted in **Figure S6**, gene expression of the PT apical membrane SGLT  
20 transporter *Sc15a1* isoform was increased at HS14 ( $p < 0.05$ ) but not at HS21. A significant  
21 reduction of the *Sc15a2* isoform was found at HS21 suggesting there could be a reduced luminal  
22 uptake of glucose in the PTs, perhaps contributing to the reduced Cx glucose levels.  
23 Gluconeogenesis may be expected to be suppressed since phosphoenolpyruvate  
24 carboxykinase 1 (*Pck1*) that acts as the rate limiting enzyme in gluconeogenesis is reduced  
25 (**Figure 5A**).

26 Many genes involved in the glycolytic and TCA cycle were altered in Cx, while less  
27 significant changes were observed in OM (**Figure S9**).

28 **Figure S10** summarizes the genes and metabolites related to the malate-aspartate  
29 shuttle. The mRNAseq analysis confirmed that this pathway exists in the Cx, but since gene  
30 expression was not assessed separately in the cytoplasm and mitochondria one cannot  
31 determine whether the expression of enzymes that directly supply protons, such as *Mdh1*, were  
32 altered in the mitochondria. Malate levels were reduced at HS21 ( $p < 0.05$ ) as was *Slc25a11* gene

1 expression which codes for the mitochondrial carrier that transports malate across the IMM. It is  
2 interesting that *Slc25a12* which codes for the protein that transports aspartate across the IMM  
3 to the intermembrane space was significantly increased at HS21, but the relevance of this is  
4 unclear.

5 **Figure S11** summarizes the genes and metabolites related to urea cycle and nitric oxide  
6 production in the renal Cx. It was found in the Cx that citrulline and arginine were significantly  
7 reduced together with a reduction in *Nos1* mRNA expression at HS14. Aspartate was found to  
8 be elevated perhaps representing a compensatory response. By HS21, arginine had returned  
9 to levels observed with LS and was associated with elevations of *Nos3* which appears to  
10 represent a compensatory response. *Arg2* mRNA expression was also elevated at HS21 which  
11 could also drive an increase of urea production although urea was not measured by the mass  
12 spec analysis.

13

#### 14 Arterial and venous metabolites and flux determinations.

15 As shown in **Figure S12**, a total of 3137 of compounds in plasma were detected when all modes  
16 were combined. Of these, 1531 are named compounds by Thermo Compound Discoverer.

17 We first analyzed the metabolomic profiles in the artery (Art) and renal vein (RV)  
18 separately. It was found that the Art (**Figure 6A**) and RV metabolomes (**Figure 6B**) as analyzed  
19 by a sparse partial least squares discriminant analysis (sPLS-DA) exhibited a clear shift in the  
20 metabolic states at HS7 and HS14. It is also evident that by HS21, the metabolic state was more  
21 similar to that found when rats were fed the LS diet representing a return to “normal” although  
22 clear differences are seen in component 2 metabolites in both Art and RV samples. This return  
23 of the metabolomic profiles toward that of the LS state after 21 days of the HS diet is also clearly  
24 seen in the associated heat maps representing those metabolites that were significantly changed  
25 by the HS diet for each of the designated modes (ANOVA Fisher’s LSD  $p < 0.05$ ). Specifically,  
26 the significantly altered metabolites in different modes are as follows: C18+ Art 96/808, C18+  
27 RV 65/808, C18- Art 35/454, C18- RV 38/454, HILIC+ Art 31/387, HILIC+ RV 40/387, HILIC- Art  
28 19/122, HILIC- RV 15/122.

29 Focusing the analysis on the differences between the Art and RV of those named  
30 compounds in response to the HS diet it is seen in **Figure S13A** that by sPLS-DA analysis that  
31 separations were found between Art-Rv metabolites in the C18+ and HILIC+ modes comparing  
32 LS and HS7, HS14 and HS21. However, there was no clear separation found between the days



1 of the HS diet. As illustrated in **Figure S12B**, within the named 1531 compounds, 546  
2 compounds were contained in the Metaboanalyst 5.0 database. Of these, 131 compounds  
3 (**Table S6**) were significantly (raw  $p < 0.05$ ) changed over time by HS as determined using linear  
4 models with covariate adjustments<sup>41</sup> on Metaboanalyst 5.0. Enrichment analysis of those  
5 metabolites revealed the significant enrichment of “oxidation of branched chain fatty acids” and  
6 “carnitine synthesis” (**Figure S13B**) including the metabolites such as carnitine, acetylcarnitine,  
7 lysine and  $\alpha$ -ketoglutarate.

8 The urine metabolomic features are summarized in **Figure S14** showing that a total of  
9 10,241 compounds were identified in the urine sample from the four modes (C18+/- and HILIC+/-  
10 ). Of these, 4980 were named compounds by Thermo Compound Discoverer and after removing  
11 those compounds not found in plasma and duplications, there remained 749 compounds. Of  
12 these, only 367 were found to match the Metaboanalyst 5.0 database which were used for the  
13 final flux analysis. Those metabolites in the urine for which the urine excretion exceeded the  
14 total kidney filtration fraction are shown in **Table S7**. With LS feeding, 19 metabolites were found  
15 to be excreted in excess of the filtration fraction. Interestingly, the number of metabolites  
16 excreted more than filtration fraction kept increasing over time (29 at HS7, 37 at HS14, and to  
17 42 at HS21) and began to include uremic toxins such as creatinine, indoxyl sulfate, and hippuric  
18 acid.

19 Calculated metabolite fluxes comparing those determined in rats fed LS to those at HS7,  
20 HS14 and HS21 are shown in **Figure 7**. In these individual graphs, metabolite fluxes are  
21 represented from two perspectives. First, whether the metabolites were released or taken up.  
22 For this purpose, the 95% confidence interval of the mean was calculated and if “0” was not  
23 contained within this confidence interval it indicates whether a compound is either released or  
24 taken up by kidney ( $p < 0.05$ ). Second, the graphs reflect whether the fluxes changes over time,  
25 for which a one-way repeated measures (RM) ANOVA post hoc Holm-Sidak was performed  
26 comparing all times to the LS fed state ( $p < 0.05$  indicated by \*). The analysis indicates that the  
27 flux of some of the important carbohydrates utilized for both glycolysis and the TCA cycle were  
28 modified by HS intake (see graphs in blue boxes). Specifically, it is seen that in the LS state  
29 glucose was being generated in the kidney ( $p < 0.05$ ) which was not observed during the days of  
30 HS feeding. Lactate release became significant ( $p < 0.05$ ) at days 14 and 21 of the HS diet with  
31 a similar trend in pyruvate. Plasma lactate concentration was validated by fluorescent assay kit  
32 and similar tendency was observed (**Table S8**). There was a greater uptake of the important

1 TCA cycle intermediate  $\alpha$ -ketoglutarate ( $p < 0.05$ ) in the LS fed rats which was no longer apparent  
2 with HS feeding. An uptake of citrate was found with the LS diet and this positive uptake was  
3 sustained throughout most of the periods of HS feeding ( $p < 0.05$ ) except at HS14. Gluconeogenic  
4 amino acids (see graphs in orange boxes) including asparagine, tryptophan, phenylalanine,  
5 valine, arginine, glutamate, histidine, and proline were released in significantly greater amounts  
6 ( $p < 0.05$ ) during various days of the HS diet. The ketogenic amino acid lysine was also released  
7 from the kidney at HS14 (see graph in green box).

8

9

10

11

12



1

## 2 **Discussion**

3 The kidneys play a crucial role in eliminating excess salt in the diet and maintaining homeostasis  
4 in the body. In salt sensitive individuals with reduced sodium excretory function BP increases  
5 when fed a high salt (HS) diet which in turn leads to vascular, cardiac and kidney dysfunction  
6 and injury. Although excess salt intake is less likely to produce hypertension in individuals with  
7 low salt sensitivity<sup>42-44</sup>, the present study finds that a HS diet does have a significant effect on  
8 kidney metabolism even in normal Sprague Dawley (SD) rats in which minimal hypertension is  
9 observed when fed a HS diet.

10

### 11 Effect of excess salt on renal hemodynamics and O<sub>2</sub> utilization in SD rats.

12 As determined by continuous 24 hr/day monitoring, the SD rats as expected showed only a slight  
13 increase in the average daily MAP (~5 mmHg) in response to the HS diet. By comparison, a  
14 relatively much larger increase in RBF was observed. An even greater increase of GFR was  
15 observed consistent with the previous research<sup>45</sup> resulting in a significant increase in the  
16 calculated filtration fraction (FF). Although high GFR salt sensitivity is thought to be associated  
17 with greater susceptibility to progression of renal dysfunction<sup>46-48</sup>, it is clear that SD rats possess  
18 compensatory mechanisms that enable them to compensate and prevent the injurious effects of  
19 a HS diet. This is in stark contrast to Dahl SS rats, which were generated by selective breeding  
20 of SD rats and whose GFR is reduced by the second week of HS feeding<sup>27</sup>. Increased filtration  
21 fractions with HS intake have also been observed in salt sensitive humans (increase in MAP by  
22 8 mmHg, increase in FF by 0.04) and women using oral contraceptives (increase in MAP by 1-  
23 2 mmHg, increase in FF by 0.02)<sup>49, 50</sup>.

24 As O<sub>2</sub> content in arterial blood did not change over time with the HS diet, O<sub>2</sub> delivery  
25 increased in proportion to RBF. On the other hand, O<sub>2</sub> consumption increased proportionally  
26 greater than the increase in the delivery. Although a HS diet was reported to decrease the tubular  
27 O<sub>2</sub> consumption in isolated micro-dissected renal tubules from mice<sup>51</sup>, this does not appear to  
28 reflect in vivo responses where tubular O<sub>2</sub> consumption is altered by many factors including GFR  
29 and RBF that must be taken into account<sup>52</sup>. Although the correlation between Na<sup>+</sup> reabsorption  
30 and O<sub>2</sub> consumption in the kidney is well recognized as determined under a variety of  
31 conditions<sup>53 30</sup>, to the best of our knowledge, this is the first report that has evaluated this  
32 relationship in the unanesthetized freely moving animal repeatedly. In previous In vivo

1 experiments with dogs, renal Na<sup>+</sup> reabsorption was reported to be 20 mol per mol of O<sub>2</sub><sup>12, 53</sup>.  
2 Our data at LS is 20.7 Na/O<sub>2</sub> (assuming 22.4 L/mol of O<sub>2</sub>), which is close to the previously  
3 reported value. It is noteworthy that the value of Na/O<sub>2</sub> did not change even under the HS (20.6  
4 at HS21). Given that 99% of the filtered Na<sup>+</sup> is reabsorbed, the tubular load is primarily dictated  
5 by increase in GFR so an increase of GFR would be expected to increase the tubular workload  
6 and O<sub>2</sub> consumption.

7 Salt administration altered the expression of many genes encoding cortical tubular Na<sup>+</sup>  
8 transporters which was especially evident at HS21. The enhanced expression of Na<sup>+</sup>  
9 transporters in the cortex may have affected metabolic changes. It was found that Na<sup>+</sup>  
10 transporters and channels were generally upregulated whereas sugar and amino acids  
11 transporters were found to be downregulated. As illustrated in **Figure S6**, in cortical tissue (Cx),  
12 increased gene expression was found of NKCC2 (*Slc12a1*) which is expressed in cTAL, NCC  
13 (*Slc12a3*) which is expressed in the aldosterone sensitive distal collecting tubules (DCT), ENaCa  
14 (*Scnn1a*) which is expressed in the DCT and cortical collecting ducts (CCD), and NHE3 (*Slc9a3*)  
15 which is expressed in proximal tubules (PT)<sup>54</sup>. Together, the increased mRNA expressions of  
16 the transporters would be expected to increase both proximal and distal tubular Na<sup>+</sup>  
17 reabsorption<sup>55, 56</sup>. These observations are consistent with the conclusions reached by Udwan et  
18 al.<sup>51</sup> that the fractional reabsorption of Na<sup>+</sup> is distributed differently along the tubule as  
19 determined by dietary Na<sup>+</sup> intake.

#### 20 21 Change in metabolites and gene expression by the high salt diet.

22 Despite the current progress in mass spectrometry and the ability to detect more than 5,000  
23 metabolites within biological samples, the number of annotated compounds reduces that number  
24 to several thousand and of those the assignment to known biochemical pathways is a limiting  
25 factor when compared to those obtained from mRNAseq analysis in which nearly 30,000 known  
26 protein-coding genes can be mapped to less than 1,000 biochemical metabolites represented in  
27 the KEGG pathway maps. In the present study we have utilized the combined strength of large-  
28 scale transcriptome sequencing (mRNAseq) with global profiling of metabolites in which the  
29 integrated analysis has identified many pathways of metabolism in which statistically significant  
30 differences to salt diet were obtained. Even those which did not reach statistically significant  
31 differences for the metabolomic analysis were of great utility when changes were consistent with  
32 pathways found of importance in the mRNAseq analysis.

1

## 2 Compensatory mechanisms to protect from hypertension and kidney injury in SD rats

3 One of the important underlying questions is what are the underlying compensatory mechanisms  
4 that protect the SD rat from hypertension and kidney injury when fed a HS diet. Although the  
5 specific answer to this question is not provided by the present analysis, enormous changes are  
6 occurring in the kidney metabolism and in many of the molecular and biochemical pathways that  
7 affect major functions of the kidney and inflammatory pathways of tissue injury. Inflammatory  
8 pathways are stimulated by ROS which is generated during the process of oxidative  
9 phosphorylation. Several pathways work as ROS scavengers are found in this study. First,  
10 oxidative pentose phosphate pathway (PPP) might be upregulated which is evident from  
11 increase in metabolites, Ribulose-5-phosphate. PPP generate NADPH which is required for  
12 antioxidant system<sup>57</sup>. Second, *Ucp2* mRNA expression elevated by the HS diet, which is also a  
13 ROS scavenger<sup>58</sup>. Activation of *Nos3* mRNA expression was also found. NOS3 generate nitric  
14 oxide and work as a ROS scavenger<sup>59</sup>. These might interact with each other to scavenge ROS  
15 and protect kidneys from damage.

16 The results of this study show that the profile of metabolites both in the kidneys and in  
17 systemic (i.e. arterial plasma) changed over time in response to the HS diet as it was found that  
18 considerable changes occurred in both arterial and renal venous blood metabolic profiles. It is  
19 very interesting, however, that although significant changes were observed in the plasma  
20 metabolic profiles at HS days 7 and 14, the general metabolic profile returned in each of these  
21 rats to one similar to that observed with the LS diet by HS day21. This is in contrast to the profiles  
22 obtained from the Cx and OM tissue analysis which were markedly changed over the 21 days  
23 of the HS diet and did not return to LS levels. This raises the interesting question of whether  
24 extrarenal changes in metabolic function might play an important role in normally protecting the  
25 kidneys from the injurious effects of a HS diet and from organs these signals might arise. There  
26 are reports that a HS diet alters the gut microbiome<sup>60, 61</sup> and liver metabolism<sup>62</sup> which need to  
27 be explored in greater depth.

28

## 29 Effects of the high salt diet on arachidonic acid metabolism pathway.

30 Important effects of a HS diet on the arachidonic acid (AA) pathway were identified by both  
31 metabolomic and mRNAseq analysis which found the upregulation of many elements of this  
32 pathway significantly altered in the Cx at HS14 with a tendency to return toward LS levels at

1 HS21 (**Figure S8**). It is well recognized that arachidonic acid is a major component of cell  
2 membrane phospholipids in the kidney which is metabolized by cyclooxygenase (COX),  
3 cytochrome P450 monooxygenase (CYP450), lipoxygenase (LOX) and leukotrienes (LTs)  
4 enzymes. COX production of prostaglandins (PG) and LTs leads to inflammatory injury in the  
5 kidney. CYP450 production of hydroxyeicosatetraenoic acids (19-HETE and 20-HETE) play  
6 important roles in tubular ion transport and in modulating tubuloglomerular feedback to regulate  
7 the load on the glomerulus<sup>63</sup>. It is interesting that despite increased expression of AA in the Cx,  
8 reduction of *Cyp4a1* and *Cyp4a2* genes was observed. This may reduce expression of 20-HETE  
9 which is known to reduce renal vasoconstriction and renal vascular responses to angiotensin II,  
10 endothelin, norepinephrine, nitric oxide and carbonmonoxide<sup>64</sup> and play a key role in kidney  
11 damage during the inflammatory process. The effects of HS on the AA pathway have been found  
12 to contribute importantly to tubular transport, BP salt-sensitivity, and kidney injury in the Dahl SS  
13 rat model of hypertension<sup>65-68</sup>. We also observed a significant increase of TXB2 in the renal Cx  
14 at HS14 which appeared to be attenuated by HS21. TXB2 is an inactive metabolite of  
15 thromboxane A2 (TXA2) which is a potent vasoconstrictor and can lead to loss of renal structural  
16 integrity and inflammatory damage to the kidney<sup>69, 70</sup>.

17  
18 High salt downregulates the TCA cycle and upregulates glycolysis.

19 There was a marked difference between the effects of the HS diet upon the metabolomic profiles  
20 of the Cx and OM. The Cx clearly showed major changes in the metabolic profiles while few  
21 changes were seen in the OM in response to the HS diet (**Figure 3**). One of the most interesting  
22 changes found in the Cx was related to the TCA cycle which at HS21 exhibited reductions in  
23 citrate, pyruvate,  $\alpha$ -ketoglutarate, succinate, and in the mRNA expression of nearly all of the  
24 enzymes controlling the activity of the TCA cycle. Conversely, glycolysis appears to be  
25 upregulated indicated by related enzymes including hexokinases, pyruvate kinases, and lactate  
26 dehydrogenases.

27 Proximal tubules are thought to have limited capacity for glycolysis with energy needs  
28 being met by oxidative mitochondrial metabolism making them susceptible to damage with acute  
29 reductions of kidney perfusion<sup>71</sup>. It was surprising to find that the HS diet upregulated glycolytic  
30 gene expression in Cx in SD rat (**Figure 5**). However, downregulation of the TCA cycle and  
31 upregulation of glycolysis has also been observed in Dahl SS rats fed a HS diet<sup>72, 73</sup>. SD rats

1 appear to possess counterregulatory pathways that protect the kidneys from the injurious effects  
2 of HS diets that occur in SS rats.

3 It is relevant that the HS diet did not produce major changes in the metabolomic profiles  
4 of the OM of SD rats. This strain to maintain normal levels of renal medullary blood perfusion.  
5 SS rats have been found to exhibit a rapid 30% reduction of medullary blood perfusion during  
6 the first week of a HS diet<sup>27</sup> and we have found in a proteomic study of isolated mitochondria of  
7 these rats a down regulation which is not observed in salt-insensitive consomic SS.13<sup>BN</sup> rats<sup>74</sup>.  
8 SS rats also exhibit a significant increase in total renal vascular resistance (RVR) when fed a  
9 HS diet while salt-insensitive rats (consomic SS.1<sup>BN</sup> rats) in contrast to a rather reduction in RVR  
10 in salt-insensitive SS.1<sup>BN</sup> and SD rats in the present study<sup>75</sup>. Protection from renal ischemia,  
11 especially in the renal OM of SD rats may preserve metabolic functions of the mTAL as  
12 suggested by an absence of a down regulation of the metabolism pathways when fed a HS diet  
13 (**Figure 3**). The downregulation of the TCA cycle proteins has been observed in mitochondria of  
14 isolated mTAL of SS rats<sup>74</sup>. Several studies from our laboratory have shown that reduction of  
15 medullary blood flow in the SD rat with chronic medullary infusion of H<sub>2</sub>O<sub>2</sub> or an SOD inhibitor  
16 (DETC) result in a salt-sensitive form of hypertension<sup>76, 77</sup>. So too, reduction of renal medullary  
17 oxidative stress in SS rats by intrarenal infusion of L-arginine reduces salt induced hypertension  
18 in SS rats<sup>78</sup>. The lack of significant changes in metabolism-related genes in OM may reflect salt  
19 insensitivity in SD.

20

### 21 Paradoxical relationship between kidney O<sub>2</sub> consumption and TCA cycle activity.

22 One of the most interesting observations of the present study was the seemingly paradoxical  
23 phenomenon of an increase in kidney O<sub>2</sub> consumption and energy usage in face of a reduction  
24 in the TCA cycle activity. What is the source of this additional energy production and O<sub>2</sub> usage?  
25 The data clearly indicate that with the down regulation of the TCA cycle with the HS diet,  
26 glycolysis became a dominant source of energy production. Yet the kidney was able to extract  
27 greater amounts of O<sub>2</sub> and RBF remained elevated above the control LS levels. The increase of  
28 renal venous lactate (**Figure 7**) is consistent with increased activity of the glycolytic pathway.  
29 Aerobic glycolysis which was originally described in cancer cells by Warburg in 1921<sup>79</sup> is also  
30 indicated to occur in the kidney<sup>12, 80</sup> and has more recently been suggested to be involved in the  
31 metabolic events observed in diabetic kidney disease and ageing<sup>81, 82</sup>. Although the biochemistry

1 of the Warburg effect is not fully understood, this phenomenon is consistent with our current  
2 observations.

3 NADH produced by the activation of glycolysis is not only used for lactate generation, but  
4 is also oxidized by the NADH shuttle. The increased release of pyruvate into the renal vein after  
5 HS suggests that not all of the excess NADH in the cytoplasm produced by activation of the  
6 glycolytic system is used for lactate production. Enzymes of malate-aspartate shuttle have been  
7 identified in the kidney<sup>83</sup> and gene expression of key enzymes in this pathway was observed in  
8 our study. The malate-aspartate shuttle has largely studied in cancer cells, and some suggest  
9 that the glucose fermentation (i.e. Warburg effect) is a secondary consequence of saturation of  
10 the shuttle<sup>84</sup>. The malate-aspartate shuttle can be stimulated by an increase in glutamine uptake  
11 <sup>85, 86</sup> which we observed (**Figure 7**). The key enzymes, oxaloacetate transaminase (GOT) and  
12 malate dehydrogenase (MDH) activate the shuttle by forming a complex with acetylation<sup>87</sup> and  
13 we observed an increase in *Got* mRNA expression. Given the recognized limitations of predicting  
14 the activity of the shuttle from gene expression levels, the data are consistent with the idea that  
15 the malate-aspartate shuttle is regenerating NADH inside of the mitochondrial matrix and  
16 sustaining oxidative phosphorylation.

17

### 18 The high salt diet alters amino acid metabolism.

19 The kidneys play a major role in the homeostasis of the body amino acid pools through the  
20 synthesis, degradation, filtration, reabsorption and urinary excretion of these compounds.  
21 Glutamine and proline from the arterial blood are largely disposed of by the kidneys and other  
22 amino acids such as serine, tyrosine and arginine generated and released from the kidneys for  
23 export to other tissues in human beings<sup>88</sup>. We did not observe the uptake of glutamine by the  
24 kidney at normal state not unexpectedly because the different species have variations in renal  
25 metabolism<sup>12, 89</sup>. The kidneys also play an important role in protein metabolism which is filtered  
26 by the glomerulus<sup>90</sup> is taken up into the lysosomes of the tubules and degraded to amino acids<sup>91,</sup>  
27 <sup>92</sup>. Even the OM of the kidney appears to participate in amino acid metabolic function in the SD  
28 rat. Specifically, a clear reduction was observed in the metabolites related to the degradation of  
29 lysine in the OM at HS14 (**Figure S8B**) which then tended to return toward LS levels at HS21.  
30 This included reductions of  $\alpha$ -ketoglutarate, glutamate, and allysine in the Lysine degradation  
31 pathway. Lysine has recently attracted attention for its ability to suppress salt-sensitive  
32 hypertension<sup>93</sup>. Although lysine is one of the essential amino acids, we found it was released



1 from the SD rat kidney after HS (**Figure 7**), consistent with observations by Jang et al.<sup>17</sup> in pig  
2 study. This is likely explained by the degradation of protein either by glomerular epithelial or  
3 tubular lysosomes during renal passage<sup>94-96</sup>. Moreover, we observed almost all the amino acids  
4 were released from kidney into renal vein in SD rats fed LS and further release was observed in  
5 most of detected amino acids when fed HS. In general, it was indicated that the production of  
6 amino acids from protein degradation is faster than amino acids utilization by the kidney and that  
7 the HS diet appeared to enhance proteolysis. There were, however, several notable exceptions  
8 to this. One of these is glutamine which was released from the kidney at LS and tended to be  
9 taken up after HS, and whose uptake is related to the activation of the malate-aspartate shuttle  
10 pathway discussed earlier.

11 It was also found that the megalin (*Lrp2*) and clathrin (*Cltc*) mRNA expression levels were  
12 reduced with the HS diet (**Figure S6**) whereas several proteases and plasmid partitioning (PAR  
13 genes) were upregulated in Cx. Megalin and clathrin are key players in apical endocytosis in  
14 PT and reduction of these proteins is related to a reduction in albumin endocytosis<sup>96, 97</sup>. Megalin  
15 is downregulated with HS diets even in salt insensitive Wistar or SD rats and in the absence of  
16 increased urinary albumin excretion<sup>98, 99</sup>. However, as discussed earlier, the fact that the  
17 expression of transporter genes in the renal cortical proximal tubules appear to be decreased  
18 while the expression of genes distal to the TAL is increased suggests that proteolysis may be  
19 enhanced, especially in distal tubules. For example, *Ctsa* and *Ctsb*, which are predominantly  
20 expressed in the proximal tubules, are downregulated, while *Ctsc* and *Ctsd*, which are highly  
21 expressed in the DCT and other areas<sup>54</sup>, are upregulated after salt loading. *Lrp2* and *Cltc*  
22 expressed in PT but not in DCT. It is known that DCT performs endocytosis of proteins, but it is  
23 not known which proteins play a key role, and further segment-specific studies are needed.

24

### 25 *Limitation*

26 Several limitations must be recognized regarding the present study. First, although RBF is  
27 conventionally reported in terms of volume flow per kidney weight, when RBF is continuously  
28 measured this normalization could not be applied since kidneys were weighted only at the end  
29 of the 21-day period of the HS diet. Based on other groups of SD rats that were studied, we  
30 observed no difference in kidney size between LS and rats fed HS for 21 days. RBF was  
31 therefore normalized by body weight recognizing that additional controls would need to be  
32 considered for studies in which the intervention produced significant changes of kidney weight.

1 Second, despite the great progress that has been made in metabolite identification and the  
2 sensitivity of the mass spectrometry techniques, continuing efforts must be made in the  
3 development of the databases and informatics to link substrates, enzymes and metabolites to  
4 biochemical and physiological pathways. At the present time, much of this integration must be  
5 carried out manually. It is important to carry out parallel transcriptomic or proteomic analysis  
6 since together these data can enhance the identification and validation of functional pathways.  
7 At the present time, much of this integration must be carried out manually.

8

### 9 *Conclusion*

10 The kidneys of even normal SD rats with low blood pressure salt sensitivity exhibited significant  
11 changes in the metabolomic profiles in order to sustain the increased transport workloads and  
12 energy needs of the kidneys. The temporal patterns identified unique metabolic changes in the  
13 first 14 days of HS followed by what appear to compensatory response required to sustain the  
14 energy requirements of the kidney. It appears that the glycolysis was enhanced, and the  
15 production of pyruvate and lactate increased despite the increased oxygen consumption, while  
16 the TCA cycle was down regulated by the HS diet in SD rat's kidney cortex. NADH produced  
17 during the process of increased glycolysis is used for lactate production in the cytoplasm and is  
18 involved in oxidative phosphorylation in mitochondria via malate-aspartate shuttle, which may  
19 contribute to oxygen consumption. Besides the activation of glycolysis, oxidative pentose  
20 phosphate pathway, uncoupling protein 2 and nitric oxide synthetase 3 were upregulated which  
21 scavenge ROS and protect against kidney damage in SD rats kidney. Although not previously  
22 identified in kidney cells, it is recognized that lactic acid fermentation can occur in muscle cells  
23 undergoing intense activity enabling ATP and NAD<sup>+</sup> production to continue glycolysis<sup>100</sup>. Finally,  
24 kidney proteolysis appears to be enhanced by the HS diet, the metabolic consequences of which  
25 is unclear. Although the present study provides interesting and provocative new data of how  
26 normal kidneys respond to a high salt diet, it is evident that additional studies will be required to  
27 now test these various hypotheses.

28

29 **Acknowledgements.** All metabolomics protocols were developed in and the mass  
30 spectrometry data was collected in the Mass Spectrometry and Protein Chemistry Lab within  
31 Protein Sciences at The Jackson Laboratory.

32



1 **Sources of Funding** This study was supported by grants for scientific research (P01 HL116264,  
2 HL149620, R01 HL151587, AHA 23POST1008714)

3 **Disclosures**

4 None.

## 1 **Figure legends**

2 **Figure 1.** Physiological responses to the 4.0% NaCl diet. (A) Twenty-four hour/day average  
3 mean arterial pressure (MAP), (B) renal blood flow (RBF), (C) oxygen delivery, (D) oxygen  
4 consumption, and (E) oxygen extraction ratio obtained from same group of SD rats (n=7). (F)  
5 Glomerular filtration rate (GFR) measured in a separate group of rats (n=6), (G) Filtration  
6 fraction. (H) Correlation between O<sub>2</sub> consumption and tubular reabsorption of Na<sup>+</sup> determine  
7 using data from the latter two groups of rats. RBF and O<sub>2</sub> data for single kidney were doubled  
8 for (G) and (H) to represent whole body values. One-way repeated measures (RM) ANOVA,  
9 Holm-Sidak for (A) – (G) and Pearson's r correlation coefficient (H) were performed. Mean ±  
10 SEM and individual data. \*p<0.05 vs Cont 3 (A), (B) or LS (C) – (G).

11 **Figure 2.** Sparse Partial Least-Squares Discriminant Analysis (sPLS-DA) of cortical (Cx) and  
12 outer medullary (OM) tissues in each of 4 modes. (A) Parameters for sPLS-DA are fixed to 5  
13 variables per component and to 20 for validation yielding 5-fold difference in coefficient of  
14 variation. Ellipses represent 95% confidence region of a bivariate normal distribution. (B) For  
15 those compounds significantly affected by high-salt (HS) (ANOVA Fisher's LSD p<0.05) a  
16 hierarchical cluster analysis was performed with a Euclidean distance measure and by the Ward  
17 algorithm and represented by heatmaps. Red: Low salt (LS), Green: 14 days of HS, Blue: 21  
18 days of HS.

19 **Figure 3.** Results of the pathway analysis of the mRNAseq data showing the top 15 KEGG  
20 pathways (in order of -log<sub>10</sub> p-values) that were either significantly increased ("up regulated") or  
21 significantly decreased ("down regulated") in cortex (Cx) and outer medulla (OM) at either HS  
22 14 or HS 21 compared to gene expression with the LS diet. Red bars denote "Signaling  
23 molecules and interaction pathway" and "Immune system pathway (KEGG map ID 04XXX)".  
24 Blue bars denote "Metabolism pathway (KEGG map ID 00XXX, 01XXX)" (August 2022).

25 **Figure 4.** Integrated figure of TCA cycle in cortex  
26 Log<sub>2</sub> fold change (FC) of high salt (HS) to low salt (LS) are represented in color. The left boxes  
27 are FC of HS14 to LS and the right boxes are FC of HS21 to LS. Thin boxes represent mRNA  
28 and thick boxes represent metabolites. Red denotes increase in expression and blue denotes  
29 decrease in expression. \*Raw p<0.05 in t-test for metabolomics and in DESeq2 for mRNAseq,  
30 \*\*Adj. p<0.05 in Benjamini and Hochberg. (KEGG map ID 00020, 00190 last update:  
31 July/28/2022)  
32 update: September/28/2022, SMP0000037 last update: November/24/2022)

1 **Figure 5.** Integrated figure of glycolysis in cortex

2 (A) Log<sub>2</sub> fold change (FC) of high salt (HS) to low salt (LS) are represented in color. The left  
3 boxes are FC of HS14 to LS and the right boxes are FC of HS21 to LS. Thin boxes represent  
4 mRNA and thick boxes represent metabolites. Red denotes increase in expression and blue  
5 denotes decrease in expression. The frame denotes oxidative pentose phosphate pathway.  
6 \*Raw p<0.05 in t-test for metabolomics and in DESeq2 for mRNAseq, \*\*Adj. p<0.05 in Benjamini  
7 and Hochberg. (KEGG map ID 00010 last update: May/7/2020, 00030 last update:  
8 December/13/2022). (B) Validation of lactate concentration in cortical tissue by fluorometric  
9 assay kit. Mean ± SEM and individual data. One-way ANOVA, No significant difference between  
10 groups.

11 **Figure 6.** sPLS-DA and heatmap of tissue

12 Sparse Partial Least-Squares Discriminant Analysis (sPLS-DA) of arterial and venous plasma in  
13 each of 4 modes (A). Parameters for sPLS-DA are fixed to number of components: 5, variables  
14 per component: 20 and validation method: 5-fold CV. Ellipses represent 95% confidence region  
15 of a bivariate normal distribution. Compounds which are significantly affected by high-salt diet  
16 (HS) (ANOVA Fisher's LSD p<0.05) are performed hierarchical cluster analysis with a Euclidean  
17 distance measure and by the Ward algorithm and represented by heatmaps (B). Red: Low salt  
18 (LS), Green: 7 days of HS, Blue: 14 days of HS, Light blue: 21 days of HS.

19 **Figure 7.** Calculated metabolic fluxes

20 Mean ± 95% confidence interval of mean and individual data are shown in each graph. Horizontal  
21 line is the day of HS, vertical line is flux (calculation written in methods. no unit). Red graph  
22 denotes the significantly taken up or released in each time point. \*p<0.05 vs low salt (LS), one-  
23 way RM ANOVA, Holm-Sidak. Blue boxes: carbohydrates (CHO), orange boxes: gluconeogenic  
24 amino acid (AA), green boxes: ketogenic AA. Purple arrows denote TCA cycle and dash arrows  
25 denote gluconeogenesis. Highlighted by yellow are metabolites which are not detected in urine  
26 (i.e. only arterial and venous plasma are used for flux calculation). Highlighted by gray are not  
27 detected in plasma. (Adapted the figure of Stryer Biochemistry. 7th edition (2012) <sup>101</sup>)

28

## 1 **References**

- 2 1. Opie LH. Acute metabolic response in myocardial infarction. *Heart*. 1971;33:129-137.
- 3 2. Dulloo AG and Jacquet J. Adaptive reduction in basal metabolic rate in response to food  
4 deprivation in humans: a role for feedback signals from fat stores. *The American journal of clinical*  
5 *nutrition*. 1998;68:599-606.
- 6 3. Marosi K, Moehl K, Navas-Enamorado I, Mitchell SJ, Zhang Y, Lehrmann E, Aon MA,  
7 Cortassa S, Becker KG and Mattson MP. Metabolic and molecular framework for the enhancement of  
8 endurance by intermittent food deprivation. *The FASEB Journal*. 2018;32:3844-3858.
- 9 4. Weinberger MH. Salt Sensitivity of Blood Pressure in Humans. *Hypertension*. 1996;27:481-  
10 490.
- 11 5. Sanada H, Jones JE and Jose PA. Genetics of Salt-Sensitive Hypertension. *Current*  
12 *Hypertension Reports*. 2011;13:55-66.
- 13 6. Sullivan JM, Prewitt RL and Ratts TE. Sodium sensitivity in normotensive and borderline  
14 hypertensive humans. *The American journal of the medical sciences*. 1988;295:370-377.
- 15 7. Whittle JC. Does Racial Variation in Risk Factors Explain Black-White Differences in the  
16 Incidence of Hypertensive End-Stage Renal Disease? *Archives of Internal Medicine*. 1991;151:1359.
- 17 8. Klag MJ. End-stage Renal Disease in African-American and White Men. *JAMA*.  
18 1997;277:1293.
- 19 9. Lipworth L, Mumma MT, Cavanaugh KL, Edwards TL, Ikizler TA, E.Tarone R, McLaughlin JK  
20 and Blot WJ. Incidence and Predictors of End Stage Renal Disease among Low-Income Blacks and  
21 Whites. *PLoS ONE*. 2012;7:e48407.
- 22 10. Vallis M. Sustained behaviour change in healthy eating to improve obesity outcomes: It is time  
23 to abandon willpower to appreciate wanting. *Clinical Obesity*. 2019;9:e12299.
- 24 11. Schultes B, Ernst B, Wilms B, Thurnheer M and Hallschmid M. Hedonic hunger is increased in  
25 severely obese patients and is reduced after gastric bypass surgery. *The American journal of clinical*  
26 *nutrition*. 2010;92:277-283.
- 27 12. Klahr S, Hamm LL, Hammerman MR and Mandel LJ. Renal Metabolism: Integrated  
28 Responses. *Comprehensive Physiology*. 2011.
- 29 13. Singh P, McDonough A, Thomson S, Skorecki K, Chertow G and Marsden P. Metabolic basis  
30 of solute transport. *Brenner and Rector's the kidney*. 1. 2016.
- 31 14. Tian Z and Liang M. Renal metabolism and hypertension. *Nature Communications*. 2021;12.
- 32 15. Kim YJ and Felig P. Maternal and amniotic fluid substrate levels during caloric deprivation in  
33 human pregnancy. *Metabolism*. 1972;21:507-512.
- 34 16. Bing RJ. Cardiac metabolism. *Physiological Reviews*. 1965;45:171-213.

- 1 17. Jang C, Hui S, Zeng X, Cowan AJ, Wang L, Chen L, Morscher RJ, Reyes J, Frezza C, Hwang  
2 HY, Imai A, Saito Y, Okamoto K, Vaspoli C, Kasprenski L, Zsido GA, Gorman JH, Gorman RC and  
3 Rabinowitz JD. Metabolite Exchange between Mammalian Organs Quantified in Pigs. *Cell*  
4 *Metabolism*. 2019;30:594-606.e3.
- 5 18. Rinschen MM, Palygin O, Guijas C, Palermo A, Palacio-Escat N, Domingo-Almenara X,  
6 Montenegro-Burke R, Saez-Rodriguez J, Staruschenko A and Siuzdak G. Metabolic rewiring of the  
7 hypertensive kidney. *Science signaling*. 2019;12:eaax9760.
- 8 19. Kuehnbaum NL and Britz-Mckibbin P. New Advances in Separation Science for Metabolomics:  
9 Resolving Chemical Diversity in a Post-Genomic Era. *Chemical Reviews*. 2013;113:2437-2468.
- 10 20. Clish CB. Metabolomics: an emerging but powerful tool for precision medicine. *Molecular Case*  
11 *Studies*. 2015;1:a000588.
- 12 21. Murray GC, Bais P, Hatton CL, Tadenev ALD, Hoffmann BR, Stodola TJ, Morelli KH, Pratt SL,  
13 Schroeder D, Doty R, Fiehn O, John SWM, Bult CJ, Cox GA and Burgess RW. Mouse models of  
14 NADK2 deficiency analyzed for metabolic and gene expression changes to elucidate pathophysiology.  
15 *Human Molecular Genetics*. 2022.
- 16 22. Shimada S, Yang C, Kurth T and Cowley Jr AW. Divergent roles of angiotensin II upon the  
17 immediate and sustained increases of renal blood flow following unilateral nephrectomy. *American*  
18 *Journal of Physiology-Renal Physiology*. 2022;322:F473-F485.
- 19 23. Shimada S and Cowley Jr AW. Long-Term Continuous Measurement of Renal Blood Flow in  
20 Conscious Rats. *Journal of Visualized Experiments: Jove*. 2022.
- 21 24. Mori T and Cowley Jr AW. Role of pressure in angiotensin II-induced renal injury: chronic  
22 servo-control of renal perfusion pressure in rats. *Hypertension*. 2004;43:752-759.
- 23 25. Evans LC, Petrova G, Kurth T, Yang C, Bukowy JD, Mattson DL and Cowley Jr AW. Increased  
24 perfusion pressure drives renal T-cell infiltration in the Dahl salt-sensitive rat. *Hypertension*.  
25 2017;70:543-551.
- 26 26. Shimada S, Abais-Battad JM, Alsheikh AJ, Yang C, Stumpf M, Kurth T, Mattson DL and  
27 Cowley Jr AW. Renal Perfusion Pressure Determines Infiltration of Leukocytes in the Kidney of Rats  
28 With Angiotensin II-Induced Hypertension. *Hypertension*. 2020;76:849-858.
- 29 27. Evans LC, Ryan RP, Broadway E, Skelton MM, Kurth T and Cowley AW. Null Mutation of the  
30 Nicotinamide Adenine Dinucleotide Phosphate-Oxidase Subunit p67<sup>phox</sup> Protects the Dahl-S Rat  
31 From Salt-Induced Reductions in Medullary Blood Flow. *Hypertension*. 2015;65:561-568.
- 32 28. Cowley AW, Ryan RP, Kurth T, Skelton MM, Schock-Kusch D and Gretz N. Progression of  
33 Glomerular Filtration Rate Reduction Determined in Conscious Dahl Salt-Sensitive Hypertensive Rats.  
34 *Hypertension*. 2013;62:85-90.

- 1 29. Friedemann J, Heinrich R, Shulhevich Y, Raedle M, William-Olsson L, Pill J and Schock-  
2 Kusch D. Improved kinetic model for the transcutaneous measurement of glomerular filtration rate in  
3 experimental animals. *Kidney International*. 2016;90:1377-1385.
- 4 30. Welch WJ, Baumgärtl H, Lübbbers D and Wilcox CS. Nephron pO<sub>2</sub> and renal oxygen usage in  
5 the hypertensive rat kidney. *Kidney International*. 2001;59:230-237.
- 6 31. Mik EG, Johannes T and Ince C. Monitoring of renal venous PO<sub>2</sub> and kidney oxygen  
7 consumption in rats by a near-infrared phosphorescence lifetime technique. *American Journal of*  
8 *Physiology-Renal Physiology*. 2008;294:F676-F681.
- 9 32. Xia J, Psychogios N, Young N and Wishart DS. MetaboAnalyst: a web server for metabolomic  
10 data analysis and interpretation. *Nucleic acids research*. 2009;37:W652-W660.
- 11 33. Cantrell CD. *Modern mathematical methods for physicists and engineers*: Cambridge  
12 University Press; 2000.
- 13 34. Wu Y-L, Hu C-Y, Lu S-S, Gong F-F, Feng F, Qian Z-Z, Ding X-X, Yang H-Y and Sun Y-H.  
14 Association between methylenetetrahydrofolate reductase (MTHFR) C677T/A1298C polymorphisms  
15 and essential hypertension: a systematic review and meta-analysis. *Metabolism*. 2014;63:1503-1511.
- 16 35. Seufert L, Benzing T, Ignarski M and Müller R-U. RNA-binding proteins and their role in kidney  
17 disease. *Nature Reviews Nephrology*. 2022;18:153-170.
- 18 36. Brooks GA. Cell–cell and intracellular lactate shuttles. *The Journal of physiology*.  
19 2009;587:5591-5600.
- 20 37. Bergmann M. A classification of proteolytic enzymes. *Advances in Enzymology (eds FF Nord,*  
21 *CH Werkman)*. 2006;2:49-67.
- 22 38. Nielsen R, Mollet G, Esquivel EL, Weyer K, Nielsen PK, Antignac C and Christensen EI.  
23 Increased lysosomal proteolysis counteracts protein accumulation in the proximal tubule during focal  
24 segmental glomerulosclerosis. *Kidney International*. 2013;84:902-910.
- 25 39. Palygin O, Ilatovskaya DV and Staruschenko A. Protease-activated receptors in kidney  
26 disease progression. *American Journal of Physiology-Renal Physiology*. 2016;311:F1140-F1144.
- 27 40. Roman RJ and Fan F. 20-HETE. *Hypertension*. 2018;72:12-18.
- 28 41. Allison PD. *Fixed effects regression models*: SAGE publications; 2009.
- 29 42. Morimoto A, Uzu T, Fujii T, Nishimura M, Kuroda S, Nakamura S, Inenaga T and Kimura G.  
30 Sodium sensitivity and cardiovascular events in patients with essential hypertension. *The Lancet*.  
31 1997;350:1734-1737.
- 32 43. Eljovich F, Weinberger MH, Anderson CAM, Appel LJ, Bursztyn M, Cook NR, Dart RA,  
33 Newton-Cheh CH, Sacks FM and Laffer CL. Salt Sensitivity of Blood Pressure. *Hypertension*.  
34 2016;68:e7-e46.



- 1 44. Weinberger MH, Fineberg NS, Fineberg SE and Weinberger M. Salt Sensitivity, Pulse  
2 Pressure, and Death in Normal and Hypertensive Humans. *Hypertension*. 2001;37:429-432.
- 3 45. Isaksson GL, Stubbe J, Lyngs Hansen P, Jensen BL and Bie P. Salt sensitivity of renin  
4 secretion, glomerular filtration rate and blood pressure in conscious Sprague-Dawley rats. *Acta*  
5 *Physiologica*. 2014;210:446-454.
- 6 46. Mose FH, Jörgensen AN, Vrist MH, Ekelöf NP, Pedersen EB and Bech JN. Effect of 3% saline  
7 and furosemide on biomarkers of kidney injury and renal tubular function and GFR in healthy subjects  
8 – a randomized controlled trial. *BMC Nephrology*. 2019;20.
- 9 47. Parmer RJ, Stone RA and Cervenka JH. Renal hemodynamics in essential hypertension.  
10 Racial differences in response to changes in dietary sodium. *Hypertension*. 1994;24:752-757.
- 11 48. Koomans HA, Roos JC, Dorhout Mees EJ and Delawi IM. Sodium balance in renal failure. A  
12 comparison of patients with normal subjects under extremes of sodium intake. *Hypertension*.  
13 1985;7:714-721.
- 14 49. Pechère-Bertschi A, Maillard M, Stalder H, Bischof P, Fathi M, Brunner HR and Burnier M.  
15 Renal hemodynamic and tubular responses to salt in women using oral contraceptives. *Kidney*  
16 *International*. 2003;64:1374-1380.
- 17 50. Weir MR, Dengel DR, Behrens MT and Goldberg AP. Salt-induced increases in systolic blood  
18 pressure affect renal hemodynamics and proteinuria. *Hypertension*. 1995;25:1339-1344.
- 19 51. Udwan K, Abed A, Roth I, Dizin E, Maillard M, Bettoni C, Loffing J, Wagner CA, Edwards A  
20 and Feraille E. Dietary sodium induces a redistribution of the tubular metabolic workload. *The Journal*  
21 *of Physiology*. 2017;595:6905-6922.
- 22 52. Hansell P, Welch WJ, Blantz RC and Palm F. Determinants of kidney oxygen consumption  
23 and their relationship to tissue oxygen tension in diabetes and hypertension. *Clinical and*  
24 *Experimental Pharmacology and Physiology*. 2013;40:123-137.
- 25 53. Kiil F, Aukland K and Refsum HE. Renal sodium transport and oxygen consumption. *American*  
26 *Journal of Physiology-Legacy Content*. 1961;201:511-516.
- 27 54. Lee JW, Chou C-L and Knepper MA. Deep Sequencing in Microdissected Renal Tubules  
28 Identifies Nephron Segment-Specific Transcriptomes. *Journal of the American Society of Nephrology*.  
29 2015;26:2669-2677.
- 30 55. Pavlov TS, Levchenko V, O'Connor PM, Ilatovskaya DV, Palygin O, Mori T, Mattson DL,  
31 Sorokin A, Lombard JH and Cowley AW. Deficiency of renal cortical EGF increases ENaC activity and  
32 contributes to salt-sensitive hypertension. *Journal of the American Society of Nephrology*.  
33 2013;24:1053-1062.
- 34 56. Blass G, Klemens CA, Brands MW, Palygin O and Staruschenko A. Postprandial effects on  
35 ENaC-mediated sodium absorption. *Scientific reports*. 2019;9:1-11.

- 1 57. Spencer NY and Stanton RC. Glucose 6-phosphate dehydrogenase and the kidney. *Current*  
2 *opinion in nephrology and hypertension*. 2017;26:43-49.
- 3 58. Aguilar E, Esteves P, Sancerni T, Lenoir V, Aparicio T, Bouillaud F, Dentin R, Prip-Buus C,  
4 Ricquier D, Pecqueur C, Guilmeau S and Alves-Guerra M-C. UCP2 Deficiency Increases Colon  
5 Tumorigenesis by Promoting Lipid Synthesis and Depleting NADPH for Antioxidant Defenses. *Cell*  
6 *Reports*. 2019;28:2306-2316.e5.
- 7 59. Cowley Jr AW, Mori T, Mattson D and Zou A-P. Role of renal NO production in the regulation  
8 of medullary blood flow. *American Journal of Physiology-Regulatory, Integrative and Comparative*  
9 *Physiology*. 2003;284:R1355-R1369.
- 10 60. Abais-Battad JM, Saravia FL, Lund H, Dasinger JH, Fehrenbach DJ, Alsheikh AJ, Zemaj J,  
11 Kirby JR and Mattson DL. Dietary influences on the Dahl SS rat gut microbiota and its effects on salt-  
12 sensitive hypertension and renal damage. *Acta Physiologica*. 2021;232:e13662.
- 13 61. Abais-Battad JM and Mattson DL. Influence of dietary protein on Dahl salt-sensitive  
14 hypertension: a potential role for gut microbiota. *American Journal of Physiology-Regulatory,*  
15 *Integrative and Comparative Physiology*. 2018;315:R907-R914.
- 16 62. Kato T, Niizuma S, Inuzuka Y, Kawashima T, Okuda J, Kawamoto A, Tamaki Y, Iwanaga Y,  
17 Soga T and Kita T. Analysis of liver metabolism in a rat model of heart failure. *International journal of*  
18 *cardiology*. 2012;161:130-136.
- 19 63. Welch WJ and Wilcox CS. Modulating role for thromboxane in the tubuloglomerular feedback  
20 response in the rat. *Journal of Clinical Investigation*. 1988;81:1843-1849.
- 21 64. Roman RJ. P-450 metabolites of arachidonic acid in the control of cardiovascular function.  
22 *Physiological reviews*. 2002;82:131-185.
- 23 65. Yamashita W, Ito Y, Weiss MA, Ooi BS and Pollak VE. A thromboxane synthetase antagonist  
24 ameliorates progressive renal disease of Dahl-S rats. *Kidney international*. 1988;33:77-83.
- 25 66. Fujii K, Onaka U, Ohya Y, Ohmori S, Tominaga M, Abe I, Takata Y and Fujishima M. Role of  
26 eicosanoids in alteration of membrane electrical properties in isolated mesenteric arteries of salt-  
27 loaded, Dahl salt-sensitive rats. *British Journal of Pharmacology*. 1997;120:1207-1214.
- 28 67. Ren Y, D'Ambrosio MA, Garvin JL, Peterson EL and Carretero OA. Mechanism of impaired  
29 afferent arteriole myogenic response in Dahl salt-sensitive rats: role of 20-HETE. *American Journal of*  
30 *Physiology-Renal Physiology*. 2014;307:F533-F538.
- 31 68. Uehara Y, Tobian L and Iwai J. Platelet thromboxane inhibition by plasma polypeptides in  
32 prehypertensive Dahl rats. *Hypertension*. 1986;8:11180.
- 33 69. Salvati P, Ferti C, Ferrario RG, Lamberti E, Duzzi L, Bianchi G, Remuzzi G, Perico N, Benigni  
34 A and Braidotti P. Role of enhanced glomerular synthesis of thromboxane A2 in progressive kidney  
35 disease. *Kidney international*. 1990;38:447-458.



- 1 70. Wang T, Fu X, Chen Q, Patra JK, Wang D, Wang Z and Gai Z. Arachidonic Acid Metabolism  
2 and Kidney Inflammation. *International Journal of Molecular Sciences*. 2019;20:3683.
- 3 71. Schaub JA, Venkatachalam MA and Weinberg JM. Proximal tubular oxidative metabolism in  
4 acute kidney injury and the transition to CKD. *Kidney360*. 2021;2:355.
- 5 72. Wang Y, Liu X, Zhang C and Wang Z. High salt diet induces metabolic alterations in multiple  
6 biological processes of Dahl salt-sensitive rats. *The Journal of nutritional biochemistry*. 2018;56:133-  
7 141.
- 8 73. Tanada Y, Okuda J, Kato T, Minamino-Muta E, Murata I, Soga T, Shioi T and Kimura T. The  
9 metabolic profile of a rat model of chronic kidney disease. *PeerJ*. 2017;5:e3352.
- 10 74. Zheleznova NN, Yang C, Ryan RP, Halligan BD, Liang M, Greene AS and Cowley Jr AW.  
11 Mitochondrial proteomic analysis reveals deficiencies in oxygen utilization in medullary thick  
12 ascending limb of Henle in the Dahl salt-sensitive rat. *Physiological genomics*. 2012.
- 13 75. Potter JC, Whiles SA, Miles CB, Whiles JB, Mitchell MA, Biederman BE, Dawoud FM, Breuel  
14 KF, Williamson GA, Picken MM and Polichnowski AJ. Salt-Sensitive Hypertension, Renal Injury, and  
15 Renal Vasodysfunction Associated With Dahl Salt-Sensitive Rats Are Abolished in Consomic SS.BN1  
16 Rats. *Journal of the American Heart Association*. 2021;10.
- 17 76. Makino A, Skelton MM, Zou A-P and Cowley AW. Increased Renal Medullary H<sub>2</sub>O<sub>2</sub> Leads to  
18 Hypertension. *Hypertension*. 2003;42:25-30.
- 19 77. Makino A, Skelton MM, Zou A-P, Roman RJ and Cowley AW. Increased Renal Medullary  
20 Oxidative Stress Produces Hypertension. *Hypertension*. 2002;39:667-672.
- 21 78. Miyata N and Cowley AW. Renal Intramedullary Infusion of  $\text{L-Arginine}$  Prevents  
22 Reduction of Medullary Blood Flow and Hypertension in Dahl Salt-Sensitive Rats. *Hypertension*.  
23 1999;33:446-450.
- 24 79. Warburg O. The metabolism of carcinoma cells. *The Journal of Cancer Research*. 1925;9:148-  
25 163.
- 26 80. Lee JB and Peterhm. Effect of oxygen tension on glucose metabolism in rabbit kidney cortex  
27 and medulla. *American Journal of Physiology-Legacy Content*. 1969;217:1464-1471.
- 28 81. Zhang G, Darshi M and Sharma K. The Warburg effect in diabetic kidney disease. *Seminars in*  
29 *nephrology*. 2018;38:111-120.
- 30 82. Burns JS and Manda G. Metabolic pathways of the Warburg effect in health and disease:  
31 perspectives of choice, chain or chance. *International journal of molecular sciences*. 2017;18:2755.
- 32 83. Guder WG and Ross BD. Enzyme distribution along the nephron. *Kidney international*.  
33 1984;26:101-111.

- 1 84. Wang Y, Stancliffe E, Fowle-Grider R, Wang R, Wang C, Schwaiger-Haber M, Shriver LP and  
2 Patti GJ. Saturation of the mitochondrial NADH shuttles drives aerobic glycolysis in proliferating cells.  
3 *Molecular cell*. 2022;82:3270-3283. e9.
- 4 85. Friedrichs D. On the stimulation of gluconeogenesis by L-lysine in isolated rat kidney cortex  
5 tubules. *Biochimica et Biophysica Acta (BBA)-General Subjects*. 1975;392:255-270.
- 6 86. Stumvoll M, Perriello G, Meyer C and Gerich J. Role of glutamine in human carbohydrate  
7 metabolism in kidney and other tissues. *Kidney International*. 1999;55:778-792.
- 8 87. Yang H, Zhou L, Shi Q, Zhao Y, Lin H, Zhang M, Zhao S, Yang Y, Ling ZQ, Guan KL, Xiong Y  
9 and Ye D. SIRT3-dependent GOT2 acetylation status affects the malate–aspartate NADH shuttle  
10 activity and pancreatic tumor growth. *The EMBO Journal*. 2015;34:1110-1125.
- 11 88. Garibotto G, Sofia A, Saffioti S, Bonanni A, Mannucci I and Verzola D. Amino acid and protein  
12 metabolism in the human kidney and in patients with chronic kidney disease. *Clinical Nutrition*.  
13 2010;29:424-433.
- 14 89. Wirthensohn G and Guder WG. Renal substrate metabolism. *Physiological Reviews*.  
15 1986;66:469-497.
- 16 90. Dickson LE, Wagner MC, Sandoval RM and Molitoris BA. The proximal tubule and  
17 albuminuria: really! *Journal of the American Society of Nephrology*. 2014;25:443-453.
- 18 91. Tojo A and Kinugasa S. Mechanisms of Glomerular Albumin Filtration and Tubular  
19 Reabsorption. *International Journal of Nephrology*. 2012;2012:1-9.
- 20 92. Mori KP, Yokoi H, Kasahara M, Imamaki H, Ishii A, Kuwabara T, Koga K, Kato Y, Toda N,  
21 Ohno S, Kuwahara K, Endo T, Nakao K, Yanagita M, Mukoyama M and Mori K. Increase of Total  
22 Nephron Albumin Filtration and Reabsorption in Diabetic Nephropathy. *Journal of the American*  
23 *Society of Nephrology*. 2017;28:278-289.
- 24 93. Rinschen MM, Palygin O, El-Meanawy A, Domingo-Almenara X, Palermo A, Dissanayake LV,  
25 Golosova D, Schafroth MA, Guijas C, Demir F, Jaegers J, Gliozzi ML, Xue J, Hoehne M, Benzing T,  
26 Kok BP, Saez E, Bleich M, Himmerkus N, Weisz OA, Cravatt BF, Krüger M, Benton HP, Siuzdak G  
27 and Staruschenko A. Accelerated lysine metabolism conveys kidney protection in salt-sensitive  
28 hypertension. *Nature Communications*. 2022;13.
- 29 94. Russo LM, Bakris GL and Comper WD. Renal handling of albumin: a critical review of basic  
30 concepts and perspective. *American journal of kidney diseases*. 2002;39:899-919.
- 31 95. Osicka TM and Comper WD. Protein degradation during renal passage in normal kidneys is  
32 inhibited in experimental albuminuria. *Clinical science (London, England: 1979)*. 1997;93:65-72.
- 33 96. Russo L, Sandoval R, McKee M, Osicka T, Collins A, Brown D, Molitoris B and Comper W.  
34 The normal kidney filters nephrotic levels of albumin retrieved by proximal tubule cells: retrieval is  
35 disrupted in nephrotic states. *Kidney international*. 2007;71:504-513.

- 1 97. Christensen EI and Birn H. Megalin and cubilin: multifunctional endocytic receptors. *Nature*  
2 *Reviews Molecular Cell Biology*. 2002;3:258-267.
- 3 98. Washino S, Hosohata K, Jin D, Takai S and Miyagawa T. Early urinary biomarkers of renal  
4 tubular damage by a high-salt intake independent of blood pressure in normotensive rats. *Clinical and*  
5 *Experimental Pharmacology and Physiology*. 2018;45:261-268.
- 6 99. Jo SM, Nam J, Park S-Y, Park G, Kim BG, Jeong G-H, Hurh BS and Kim JY. Effect of Mineral-  
7 Balanced Deep-Sea Water on Kidney Function and Renal Oxidative Stress Markers in Rats Fed a  
8 High-Salt Diet. *International Journal of Molecular Sciences*. 2021;22:13415.
- 9 100. Manoj KM, Nirusimhan V, Parashar A, Edward J and Gideon DA. Murburn precepts for lactic-  
10 acidosis, Cori cycle, and Warburg effect: Interactive dynamics of dehydrogenases, protons, and  
11 oxygen. *Journal of Cellular Physiology*. 2022;237:1902-1922.
- 12 101. Berg JM, Tymoczko JL and Stryer L. *Biochemistry*. 7th ed. ed. New York: W.H. Freeman;  
13 2012.
- 14

Figure 1.

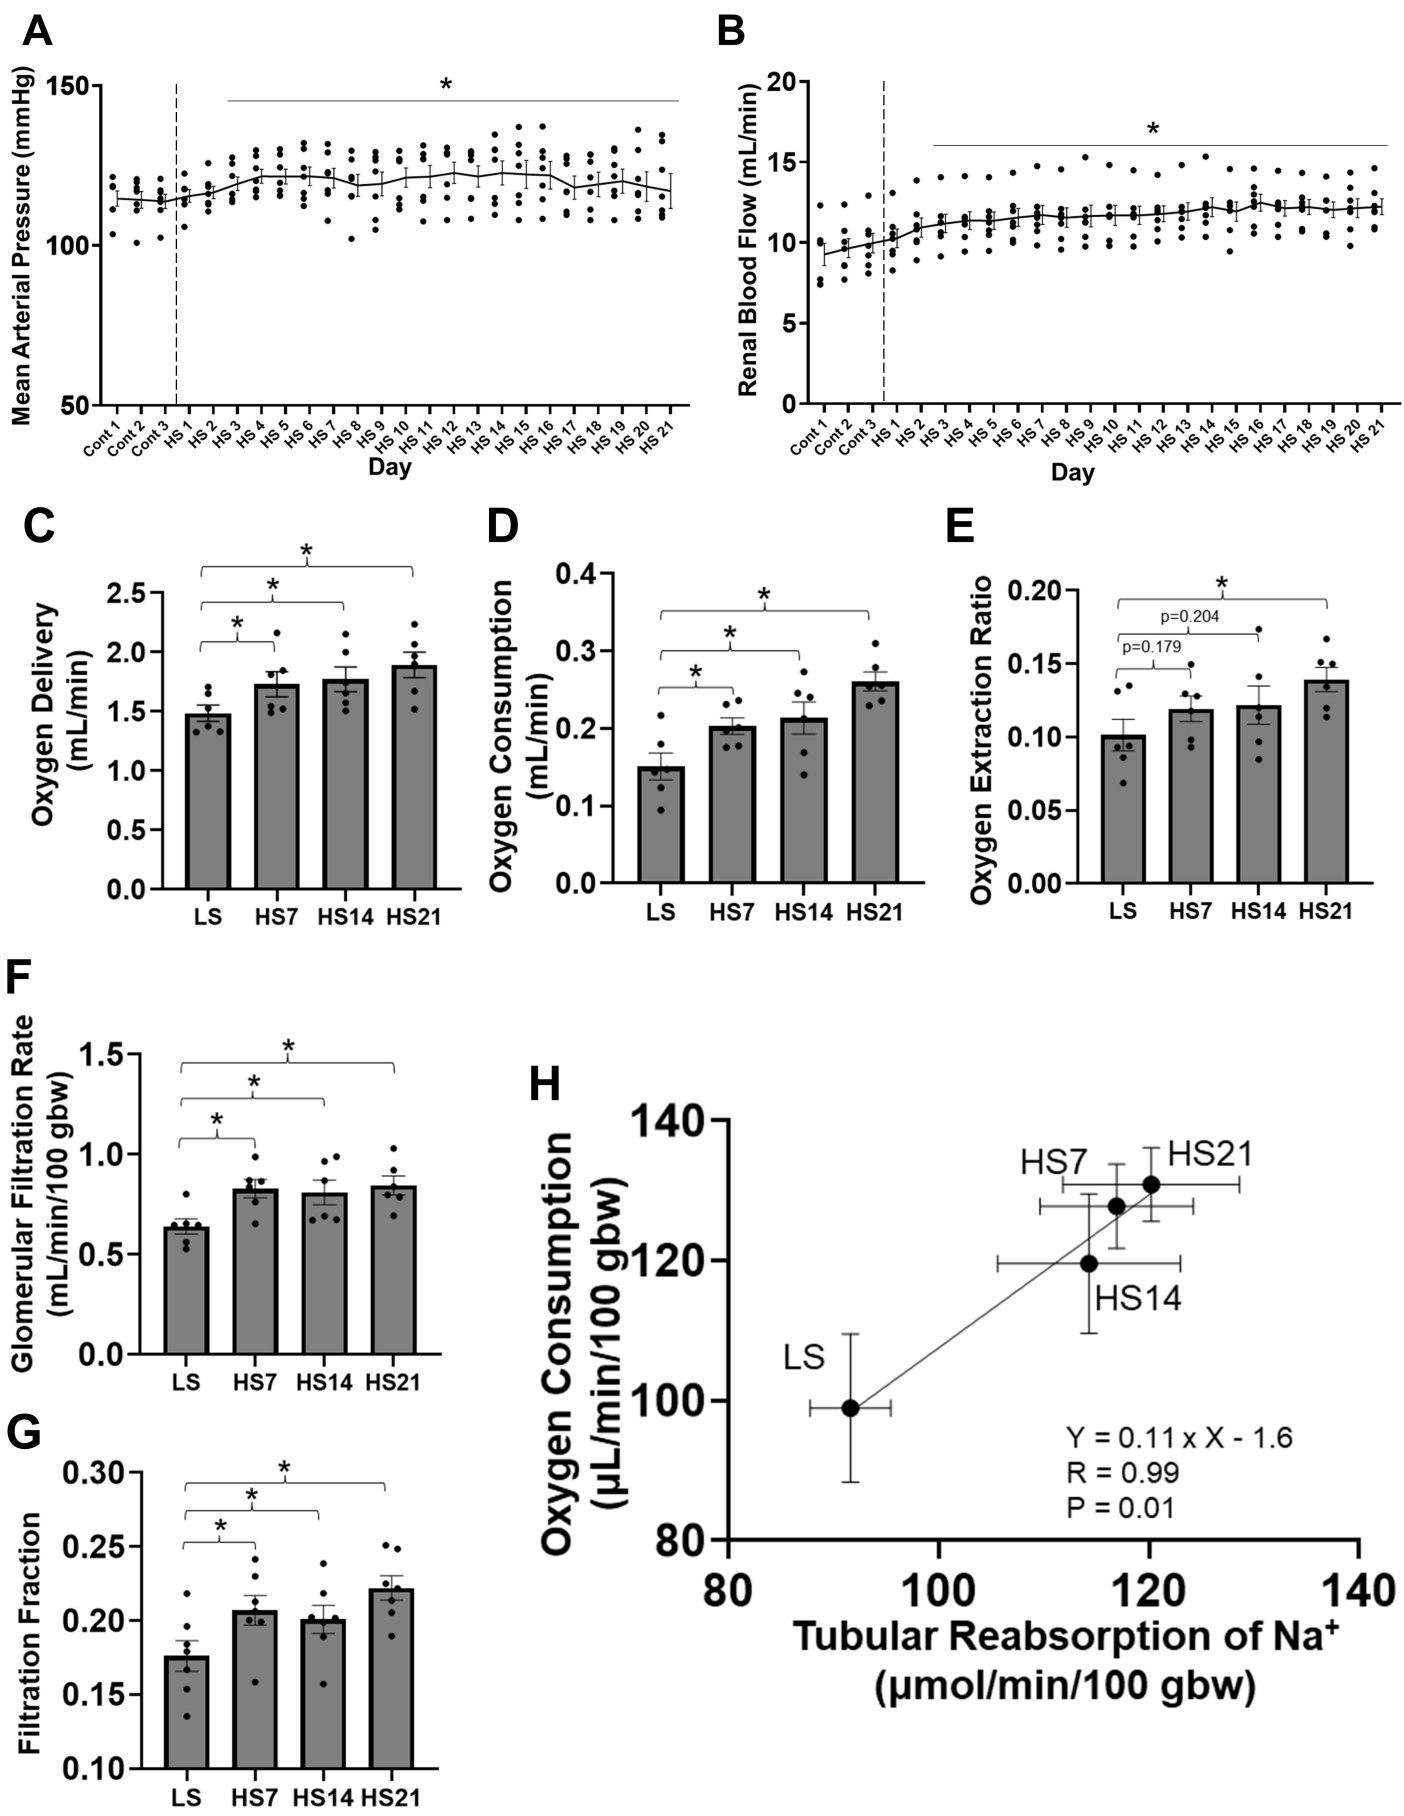

Figure 2.

A

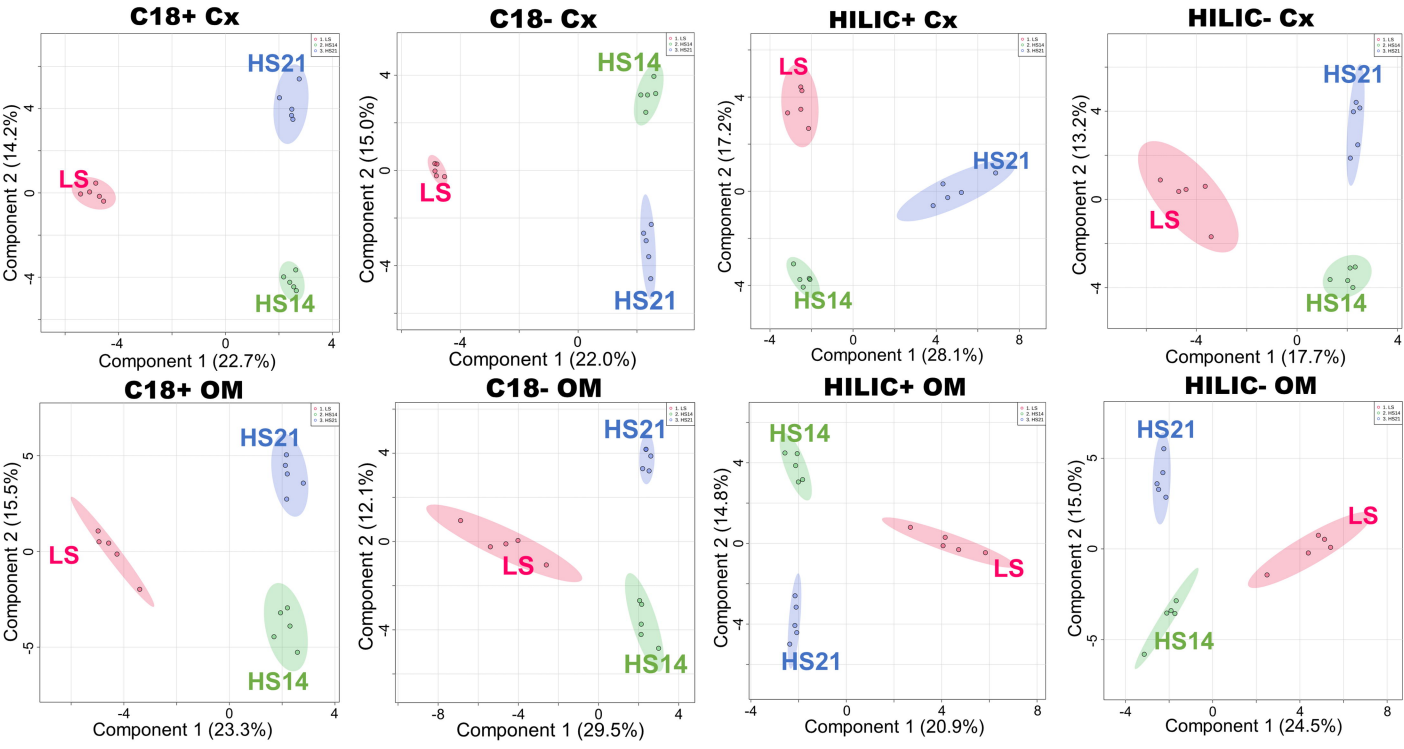

B

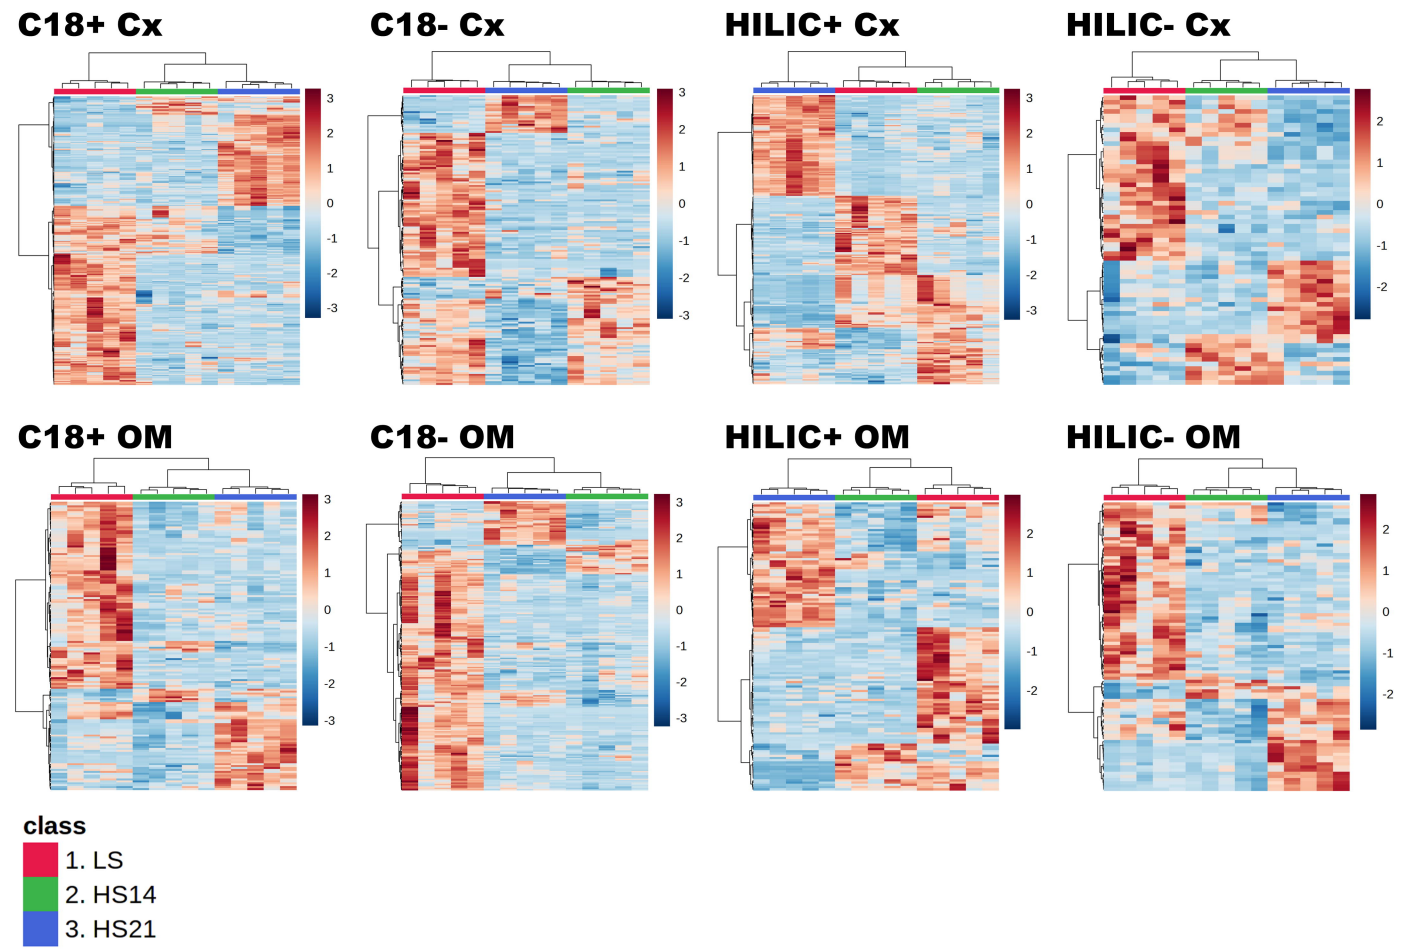

# Figure 3.

## Cx HS14 compared to LS

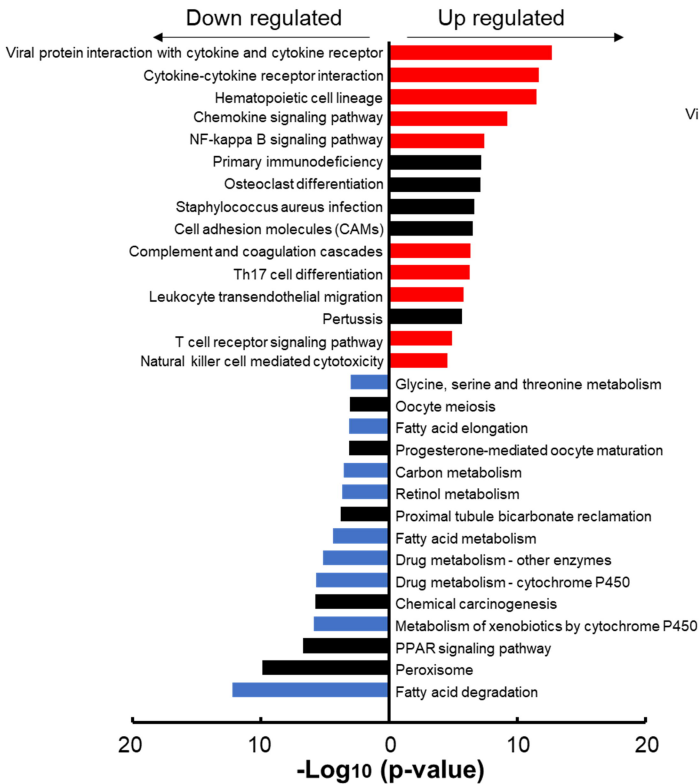

## Cx HS21 compared to LS

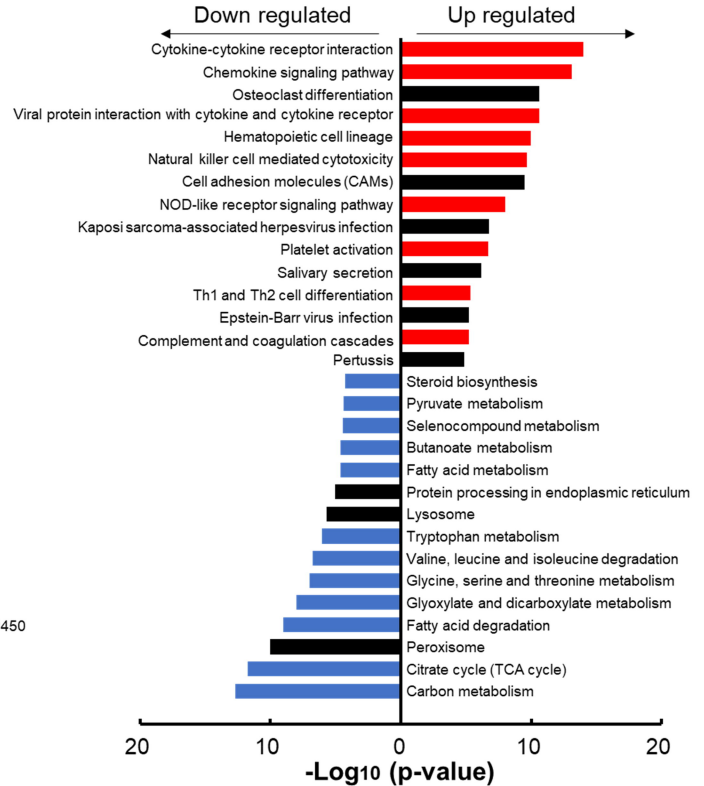

## OM HS14 compared to LS

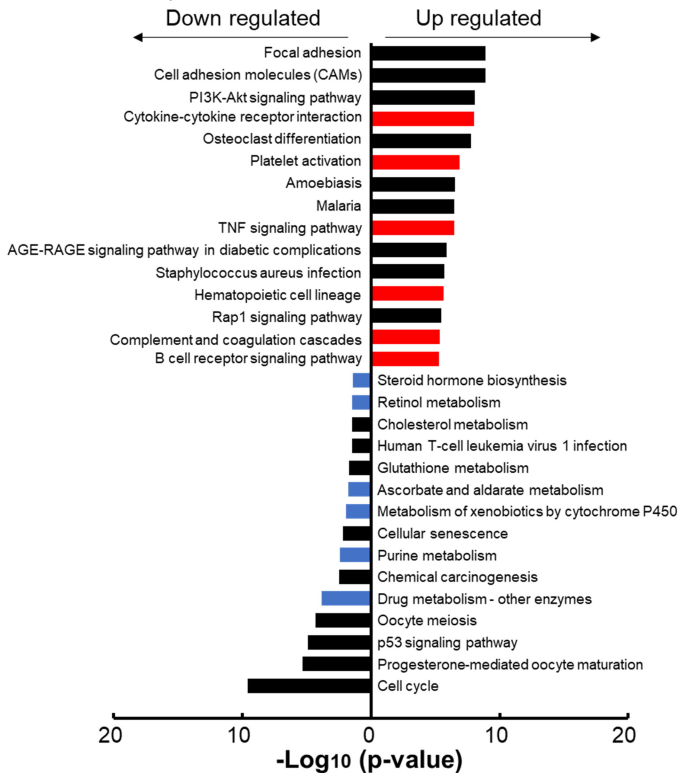

## OM HS21 compared to LS

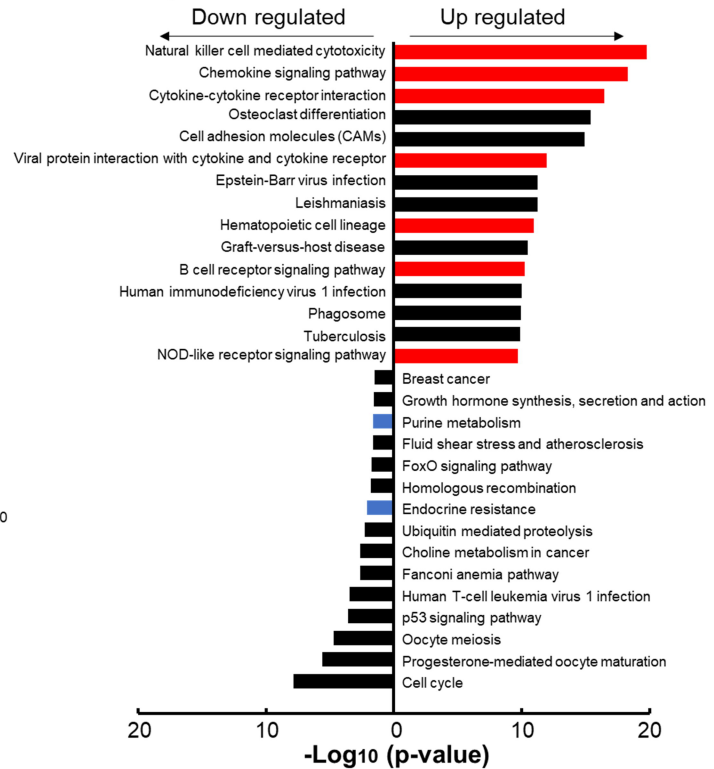



Figure 4.

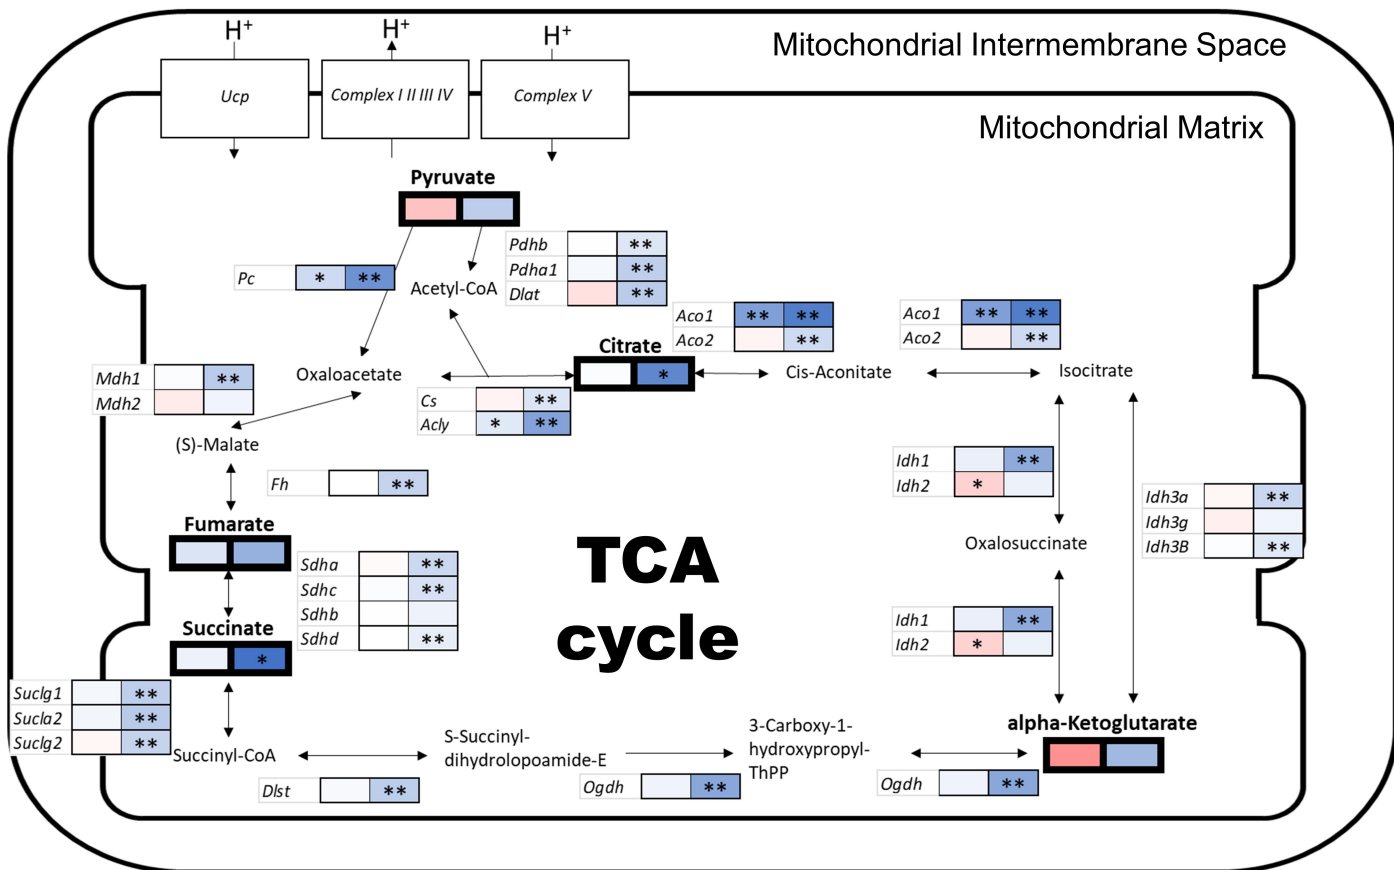

**UCP**

|             |    |    |
|-------------|----|----|
| <i>Ucp2</i> | ** | ** |
| <i>Ucp1</i> | NA | NA |
| <i>Ucp3</i> | NA | NA |

**Complex I**

|                     |    |                    |    |
|---------------------|----|--------------------|----|
| <i>Ndufa13</i>      | ** | <i>Ndufb7</i>      | ** |
| <i>Ndufa5</i>       |    | <i>Ndufb2</i>      |    |
| <i>Mt-nd1</i>       |    | <i>Ndufa9</i>      | ** |
| <i>Mt-nd2</i>       | *  | <i>Ndufs5</i>      |    |
| <i>Mt-nd3</i>       | *  | <i>Ndufs7</i>      |    |
| <i>Mt-nd4l</i>      |    | <i>Ndufs4</i>      |    |
| <i>Mt-nd4</i>       | ** | <i>Ndufv3</i>      | ** |
| <i>Mt-nd5</i>       |    | <i>Ndufa10</i>     | *  |
| <i>Mt-nd6</i>       | *  | <i>Ndufa4</i>      |    |
| <i>LOC688963</i>    |    | <i>Ndufb10</i>     |    |
| <i>Ndufs2</i>       | ** | <i>LOC684509</i>   |    |
| <i>Ndufa2</i>       |    | <i>Ndufc1</i>      | *  |
| <i>Ndufc2</i>       | *  | <i>AC103574.4</i>  |    |
| <i>LOC683884</i>    | *  | <i>Ndufv2</i>      |    |
| <i>Ndufs8</i>       | *  | <b>Complex II</b>  |    |
| <i>Ndufv1</i>       |    | <i>Sdha</i>        | ** |
| <i>Ndufb8</i>       |    | <i>Sdhc</i>        | ** |
| <i>Ndufb5</i>       |    | <i>Sdhb</i>        |    |
| <i>Ndufs3</i>       |    | <i>Sdhd</i>        | ** |
| <i>Ndufa8</i>       |    | <b>Complex III</b> |    |
| <i>Ndufb6</i>       | ** | <i>Mt-cytb</i>     | *  |
| <i>Ndufb11</i>      | *  | <i>Uqcrf1</i>      | ** |
| <i>Ndufa7</i>       | *  | <i>Uqcr2</i>       | ** |
| <i>LOC100910710</i> |    | <i>Cyc1</i>        |    |
| <i>Ndufb9</i>       |    | <i>Uqrc1</i>       |    |
| <i>Ndufa11</i>      |    | <i>Uqcrb</i>       |    |
| <i>Ndufb3</i>       |    | <i>Uqcrh</i>       |    |
| <i>Ndufs1</i>       | ** | <i>Uqcrq</i>       | ** |
| <i>Ndufa6</i>       |    | <i>Uqcr10</i>      |    |
|                     |    | <i>LOC686442</i>   | ** |

**Complex IV**

|                  |    |                 |   |    |
|------------------|----|-----------------|---|----|
| <i>Cox7c</i>     | ** | <i>Mt-atp8</i>  | * | ** |
| <i>Cox8a</i>     | *  | <i>Mt-atp6</i>  |   |    |
| <i>Cox6a1</i>    | *  | <i>Atp6v1g3</i> | * | ** |
| <i>Cox5a</i>     | ** | <i>Atp6v0d1</i> |   | ** |
| <i>Mt-co1</i>    |    | <i>Tcirg1</i>   |   | ** |
| <i>Mt-co2</i>    |    | <i>Atp6v0a4</i> |   | *  |
| <i>Mt-cox3</i>   | *  | <i>Atp5g1</i>   |   |    |
| <i>Cox4i1</i>    |    | <i>Atp6v1e1</i> |   |    |
| <i>Cox7a2</i>    |    | <i>Atp6v0a1</i> |   |    |
| <i>Cox7a2l</i>   |    | <i>Atp6v1h</i>  |   | *  |
| <i>Cox7b</i>     |    | <i>Atp6v0d2</i> |   | ** |
| <i>Cox6c</i>     | *  | <i>Atp6v1g1</i> |   |    |
| <i>Cox7a2</i>    |    | <i>Atp6v0b</i>  |   |    |
| <i>Cox6b1</i>    |    | <i>Atp6v1d</i>  |   | ** |
| <i>Cox5b</i>     |    | <i>Atp6v1c1</i> | * | ** |
| <b>Complex V</b> |    | <i>Atp5l</i>    |   | ** |
| <i>Atp5g3</i>    | ** | <i>Atp6v1b1</i> |   | ** |
| <i>Atp6v0a2</i>  |    | <i>Atp6v1c2</i> |   | ** |
| <i>Atp5c1</i>    | ** | <i>Atp6v0e2</i> |   | ** |
| <i>Atp6v1f</i>   |    | <i>Atp5h</i>    |   |    |
| <i>Atp6v1b2</i>  | *  | <i>Atp5a1</i>   |   | ** |
| <i>Atp5i</i>     |    | <i>Atp6v1a</i>  |   | ** |
| <i>Atp6v0c</i>   |    | <i>Atp5j2</i>   |   |    |
| <i>Atp5g2</i>    |    | <i>Atp6ap1</i>  | * |    |
| <i>Atp5b</i>     | ** | <i>Atp6v0e1</i> |   | ** |
| <i>Atp5f1</i>    | *  | <i>Atp5j</i>    |   | *  |
| <i>Atp5o</i>     |    | <i>Atp12a</i>   |   |    |
| <i>Atp5e</i>     | ** | <i>Sar1a</i>    |   | *  |
| <i>Atp5d</i>     | ** | <i>Ppa2</i>     |   | ** |
|                  |    | <i>Lhpp</i>     |   | ** |

**mRNA**

|  |  |  |
|--|--|--|
|  |  |  |
|--|--|--|

**Metabolites**

|  |  |  |
|--|--|--|
|  |  |  |
|--|--|--|

HS14 HS21

log<sub>2</sub> FC

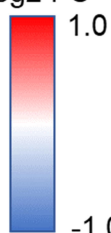

\*Raw p < 0.05

\*\*Adj. p < 0.05

Figure 5.

A

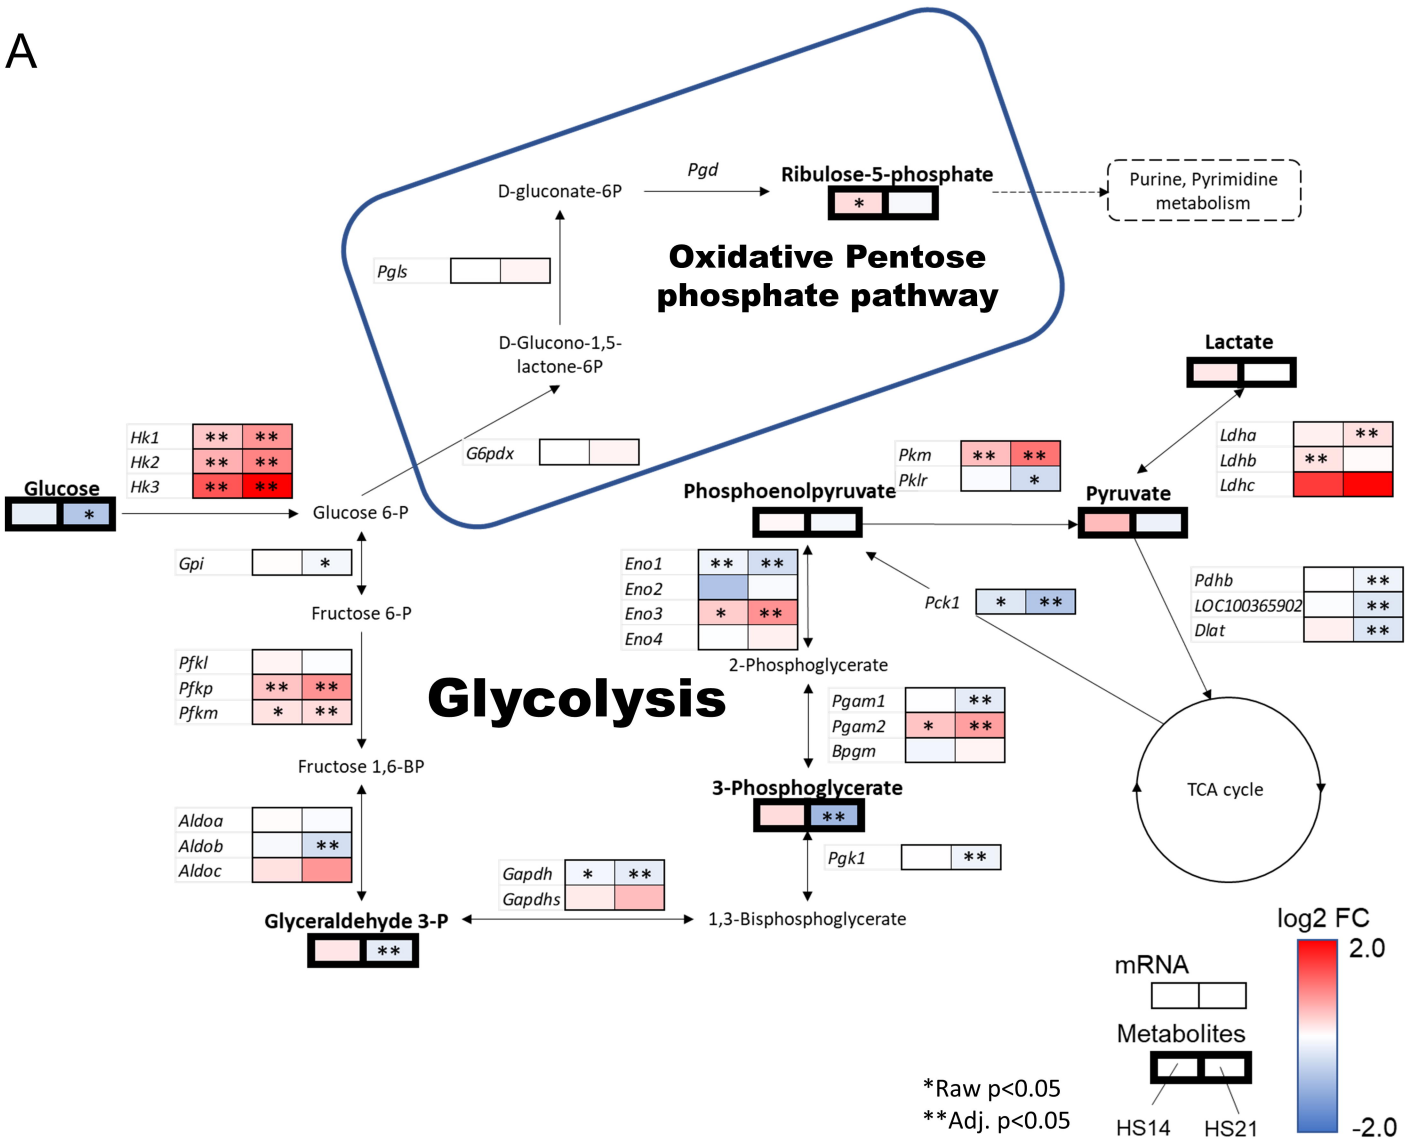

B

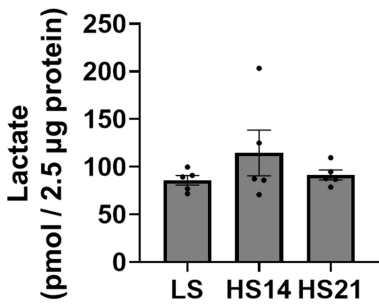

Figure 6.

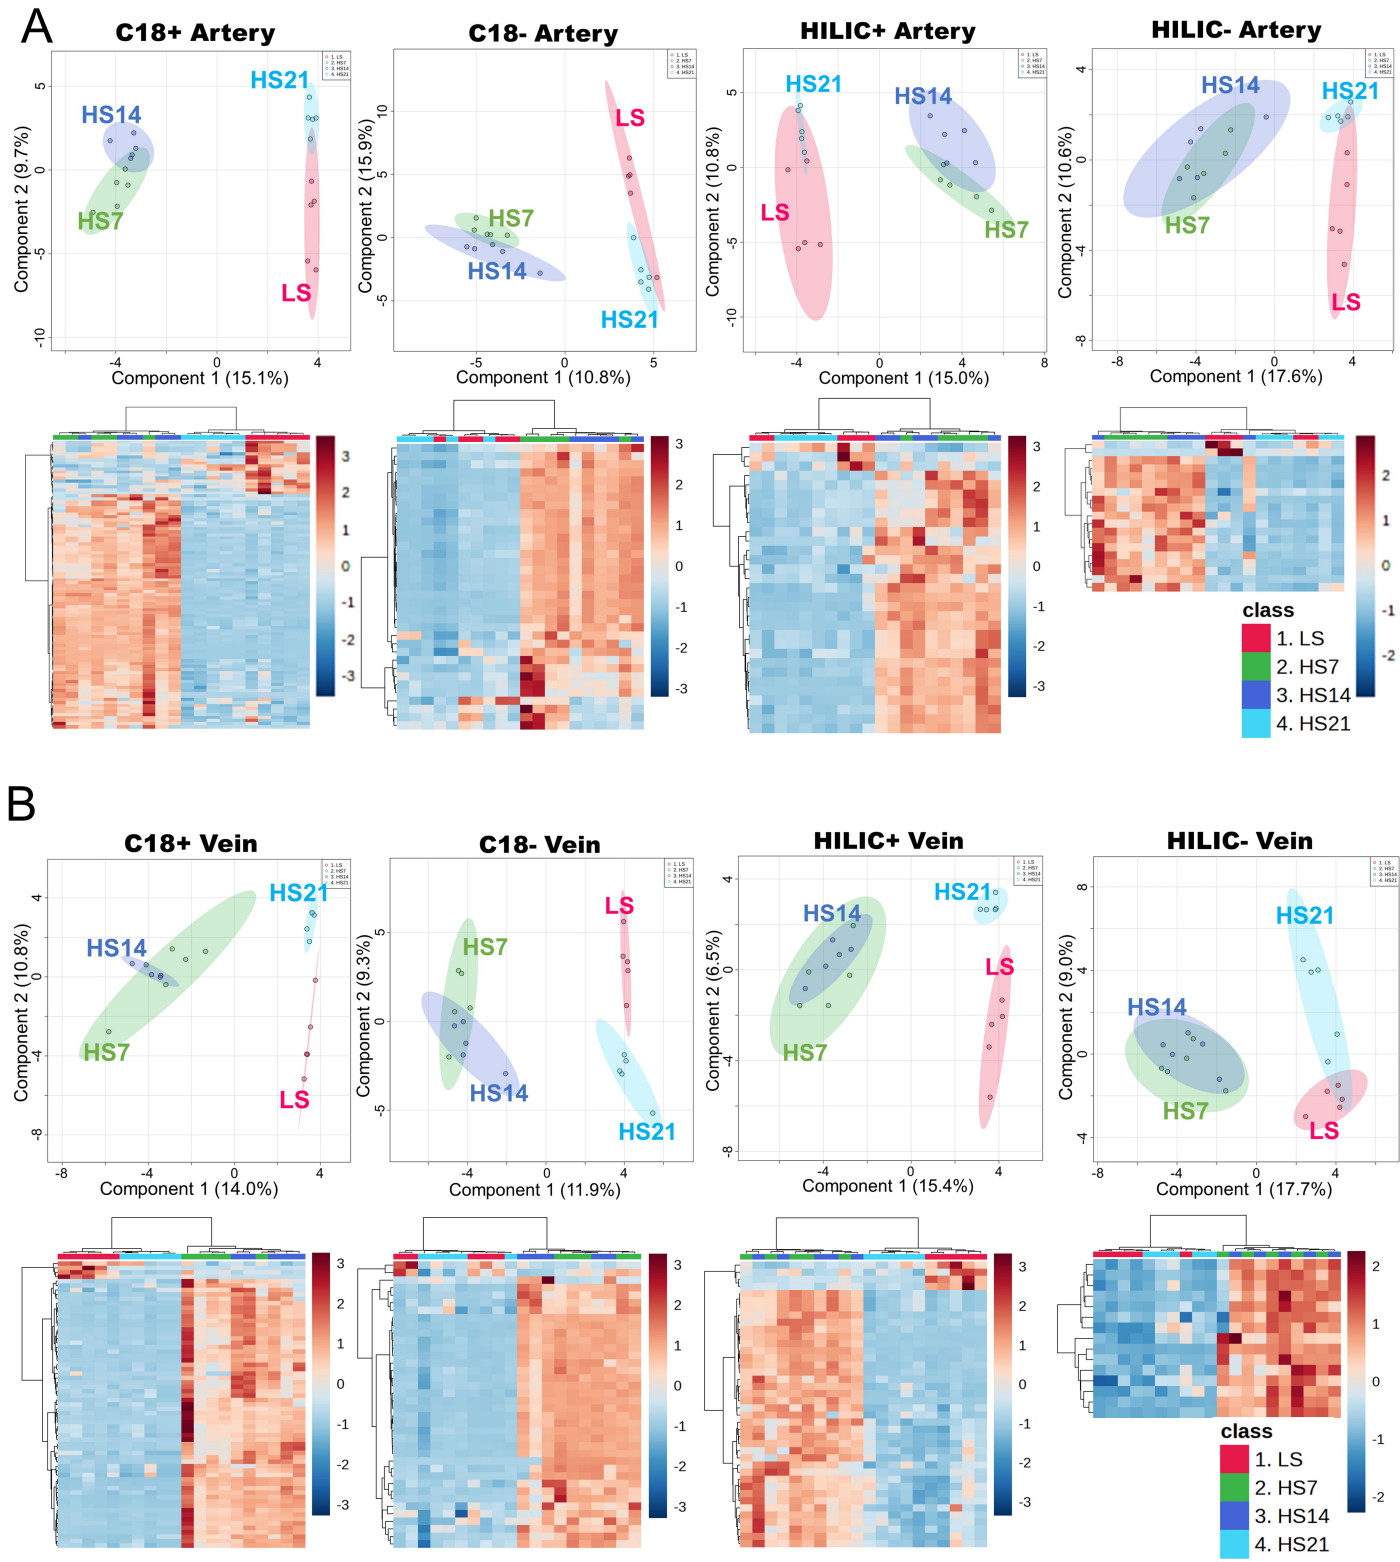

Figure 7.

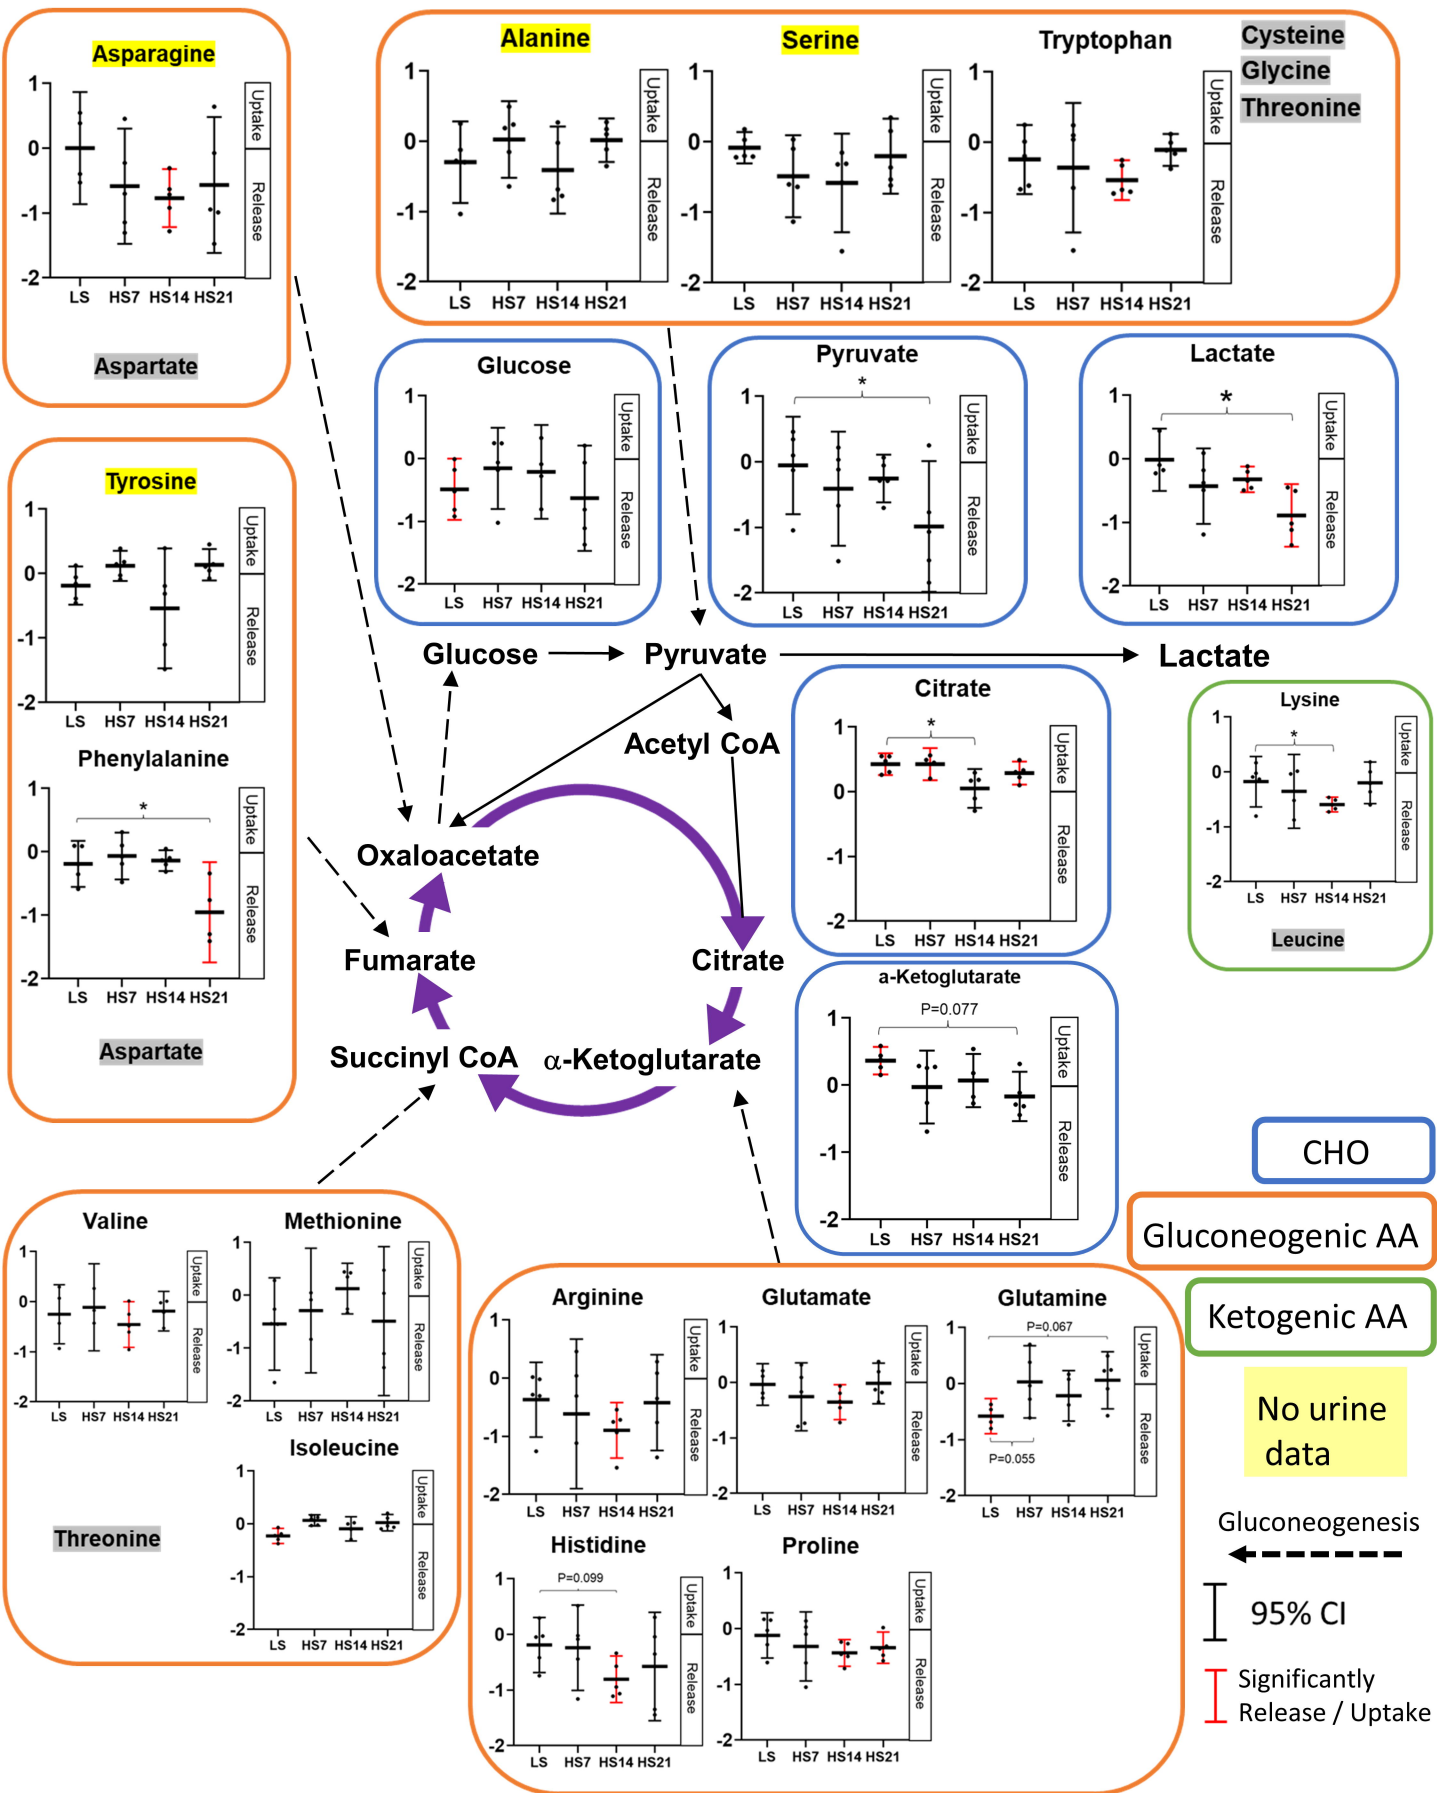

Source: https://www.biorxiv.org/content/10.1101/2023.01.18.524636v1.full.pdf
